1 **TITLE**

2 **Temperature predicts leaf shape in palms (Arecaceae)**

3

4 **Running title:**

5 Temperature predicts leaf shape in palms

6

7 **Authors**

8 Maria Fernanda Torres Jiménez<sup>1,2</sup>, Nicolas Chazot<sup>1,2</sup>, Thaise Emilio<sup>3</sup>, Johan Uddling Fredin<sup>1,2</sup>,

9 Alexandre Antonelli<sup>1,2,4,5</sup>, Søren Faurby<sup>1,2\*</sup>, Christine D. Bacon<sup>1,2\*</sup>

10

11 **Author institutions**

12 <sup>1</sup>Department of Biological and Environmental Sciences, University of Gothenburg, Box 461, SE-  
13 405 30 Gothenburg, Sweden

14 <sup>2</sup>Gothenburg Global Biodiversity Centre, Box 461, SE-405 30 Gothenburg, Sweden

15 <sup>3</sup>Programa Nacional de Pós-Doutorado (PNPD), Programa de Pós-Graduação em Ecologia,  
16 Instituto de Biologia, Universidade Estadual de Campinas (UNICAMP)

17 <sup>4</sup>Department of Plant Sciences, University of Oxford, South Parks Road, OX1 3RB Oxford,  
18 United Kingdom

19 <sup>5</sup>Royal Botanical Gardens Kew, TW9 3AE Richmond, United Kingdom

20

21 \*Shared last authorship

22

23 **Author contributions**

24 M.F.T.J. conducted data curation, formal analyses, visualisation, and writing of the original draft

25 as well as reviewing and editing. N.C. conducted data curation, formal analyses, visualisation,

26 and contributed with writing, critical review and commentary. T.E. contributed to the

27 conceptualisation and with critical review and commentary of the manuscript. J.U.F. contributed

28 to the conceptualisation and with critical review and commentary of the manuscript. A.A.

29 contributed with the critical review and commentary of the manuscript. S.F. contributed to the

30 conceptualization and methodology, and with critical review and commentary of the manuscript.

31 C.D.B. contributed to the conceptualization and with critical review and commentary of the

32 manuscript.

33

## 34 **Abstract**

35 Leaves display a remarkable variety of shapes, each potentially relevant to the function of these  
36 organs and with potential ecological advantages in certain climates. Studies correlating leaf  
37 shape with either climate or allometric constraints (how size and shape relate) focus on  
38 intraspecific variation or model organisms, and the drivers of leaf shape at a macroecological  
39 scale remain poorly known. Here, we determine associations between climatic and allometric  
40 factors with the evolution of leaf shape in a lineage with one of the highest diversities of leaf  
41 shape known, the palms (family Arecaceae). We apply a Bayesian phylogenetic mixed model to  
42 test for associations with leaf shapes (entire, pinnate, palmate, and costapalmate). We further  
43 reconstruct the ancestral leaf shape in palms using multistate speciation and extinction models.  
44 We find that high mean annual temperature correlates with dissected shapes. The ancestral leaf  
45 shape is entire, and pinnate lineages originated multiple independent times after transitions into  
46 polymorphism (species with entire or pinnate individuals). Finally, we compared the frequency  
47 of shapes with global temperatures through time through the Cenozoic. Although mean annual  
48 temperature has a positive effect on leaf dissection, the relative frequency of pinnate lineages  
49 increased as global temperatures cooled through time, potentially through colonization of open  
50 more seasonal habitats. Dissection could therefore be beneficial at high temperatures, where  
51 other leaf shaped lineages would be highly vulnerable under increased global warming. This  
52 study contributes to the understanding of leaf shape evolution and its drivers.

53

## 54 **Keywords**

55 Climate, dissection, leaf shape, macroecology, MuSSE, temperature.

56

## 57 **1. Introduction**

58 Leaves are the engines of nearly all life on land. They capture carbon dioxide from the  
59 atmosphere and convert it into readily accessible nutrients that sustain, directly or indirectly, the  
60 functioning and health of ecosystems and their biota. The basic functions they carry out  
61 – photosynthesis, transpiration and respiration – depend in turn on temperature and water  
62 availability. Because they carry out such critical functions for the plants, leaves are most likely  
63 under strong natural selection, resulting in morphological adaptations to the environmental  
64 conditions.

65           Throughout the evolution of angiosperms, variation not only in length and width but also  
66 in blade dissection (with simple and compound leaves as extremes), margin serration, and  
67 contour (e.g. orbicular versus lanceolate leaves) have evolved numerous times independently  
68 (Nicotra et al., 2011). Nonetheless, the drivers of leaf shape evolution are poorly known.  
69 Research on the evolution and adaptation of leaf shape is often limited to a handful of species  
70 (e.g. examples reviewed in Nicotra et al., 2011 and Chitwood & Sinha, 2016; Marcysiak, 2012;  
71 Leigh et al., 2017), or to model organisms like *Arabidopsis* (Piazza et al., 2010), which prevents  
72 generalization at a larger taxonomic scale.

73           General expectations regarding functionality can be drawn from examining the leaf  
74 adaptations in different environments. Traits like leaf dissection, length and, effective width  
75 (diameter of largest circle drawn within a leaf margin; Leigh et al., 2017) potentially change with  
76 climate, which affects plant temperature regulation and interacts with water availability (Nicotra  
77 et al., 2011; Peppe et al., 2011). For instance, plants in environments with extreme temperatures  
78 tend to have small or dissected leaves to prevent leaves from reaching damaging temperatures  
79 (Gates, 1986; Leigh et al., 2017; Wright et al., 2017). Deeply dissected leaves effectively  
80 function as a collection of small leaf units, with faster heat loss through convection than entire  
81 leaves of the same area (Givnish, 1979; Gurevitch & Schuepp, 1990), and are less likely to reach  
82 damaging temperatures when exposed to extreme heat. Thus, shapes that reduce leaf damage at  
83 high temperatures are expected to be beneficial in hot and dry environments (Nicotra et al., 2007;  
84 2008; Leigh et al., 2017). Under drought conditions and in arid environments with limited water  
85 availability for transpiration, stomata close and high temperatures threaten leaf function. In this  
86 case, smaller or deeply dissected shapes reduce overheating and optimize the safety of the leaf  
87 (Nardini & Luglio, 2014). Dissection could be beneficial also in species with large and wide  
88 leaves that are optimized for high gas exchange, as dissection makes the transportation of water  
89 to areas of the blade farthest from the rachis more effective (Givnish, 1979). In contrast, cool  
90 climatic conditions may favor entire leaf shapes over dissected shapes, where leaf heating leads  
91 to higher temperatures in the leaf compared to the air, which can be beneficial for photosynthesis  
92 and growth.

93  
94           Leaf shape, particularly size, can be tuned to maximize light capture in environments  
95 with limited sunlight. This is particularly relevant for monopodial plants (non-branching plants

96 with a single stem or growth axis) that depend on leaf size or number to increase the total  
97 photosynthetic area (Chazdon, 1985; Renninger & Phillips, 2016). However, leaf size is limited  
98 by allometry where following Corner's rule, "the larger and sturdy an axis is, the larger and more  
99 complicated are its appendages" (Corner, 1949; Tomlinson, 2006). Thus, to produce larger  
100 leaves and capture more light, the plant needs to invest significant energy in leaf supporting  
101 structures (e.g. petioles and rachis) that are strong enough to resist the stress from wind and rain  
102 (Chazdon, 1986). In the forest understory, small leaves with entire shapes could be easier to  
103 arrange to maximise light capture than dissected leaves. For very large leaves, dissection allows  
104 the leaflets to move independently and reduce the drag produced by strong winds (Niklas, 1992;  
105 Vogel, 2009; Blein et al., 2010). Corner's rule has been observed in the palm *Geonoma congesta*,  
106 in which leaf size and dissection are positively correlated to stem diameter and crown height  
107 (Chazdon, 1991a). Another relationship between dissection and allometry is described by the  
108 "rapid growth hypothesis" (Givnish 1978, 1984; Niinemets, 1998), which states that dissection  
109 allows plants to grow rapidly during periods of high light availability by maximizing light  
110 capture while investing less in wood density. This association between dissection and growth has  
111 been found in Amazonian trees (Malhado et al., 2010). Finally, it has been suggested that  
112 dissection has varied ecological roles in herbivory: limiting how effectively herbivores feed  
113 (Brown & Lawton, 1991), increasing the chance of herbivory via a correlation with leaf size and  
114 growth (Rivero-Lynch et al., 1996), or reducing herbivory by acting like variegated leaves in that  
115 patterns of discoloration "distort" the leaf's edges (Givnish, 1990; Campitelli et al., 2008).

116 Leaf shape results from trade-offs between physiological and allometric constraints,  
117 phylogenetic history, and natural selection (Givnish, 1987; Tsukaya, 2006; Nicotra et al., 2011).  
118 Whether leaf shapes have evolved in response to climatic or phylogenetic constraints, the  
119 distribution of leaf shape and their evolution through time should reflect evolutionary processes.  
120 In this study, we use palms (Arecaceae) to understand the macroevolutionary drivers of leaf  
121 shape variation. Palms are tropical and subtropical, with 80% of the species distributed within a  
122 15-30°C mean annual temperature range (Dransfield et al., 2008), and which exhibit high leaf  
123 shape variation compared to other monocots (Horn et al., 2009; Gunawardena & Dengler, 2004).  
124 Palms are primarily monopodial (i.e. do not branch) with non-deciduous leaves (Tomlinson,  
125 2006; Dransfield et al., 2008), allowing us to control for the effect of branching strategies over  
126 leaf-climate relationships.



127 Here, we hypothesise that dissection is beneficial in high temperatures. If this is the case,  
128 we expect temperature to have a positive effect on the distribution of dissection throughout the  
129 palm phylogeny. We also hypothesise that taller species are more likely to have dissected leaves  
130 as dissection could allow for large leaves that scale with plant height. In this case, we expect  
131 larger plants to be dissected because dissection allows for larger leaves that are more resistant to  
132 mechanical damage and that have better weight distribution along the rachis, hence a positive  
133 effect of plant height on dissection. We tested these predictions for extant taxa over geological  
134 time scale. On the one hand, if our predictions are true, extant variations in climatic conditions  
135 across ecoregions should predict the current distribution of palms and leaf shapes. On the other  
136 hand, the evolution of leaf shapes through time since the origin of palms should reflect major  
137 global climatic changes that occurred since the Late Cretaceous, when palms are thought to have  
138 originated (Dransfield et al., 2008). Here, we contribute to the knowledge gap concerning  
139 climatic factors and plant allometry. Understanding the evolution of leaf shape through past and  
140 current environmental conditions provides a context for predicting plant responses to changing  
141 climates (Chitwood & Sinha., 2016).

## 142 2. Methods

143 We conducted all GLMMs and ancestral trait reconstruction analyses at the species level  
144 using a time-calibrated Maximum Clade Credibility tree generated from the tree distribution  
145 generated originally by Faurby et al. (2016) and updated by Hill et al. (unpublished). The  
146 phylogeny includes 2550 species that were used to annotate leaf shapes, recover coordinate  
147 records from the Global Biodiversity Information Facility (GBIF), and estimate species medians  
148 for the climatic and allometric variables. We standardized the taxonomic identifications across  
149 all data sources using the Kew's World Checklist of Selected Plant Families (WCSP) for  
150 Arecaceae (Govaerts et al., 2020). We removed all GBIF records which could not be  
151 unambiguously assigned to any of the species accepted by the WCSP.

### 152 153 *Leaf shape in palms*

154 Leaf shape variation in palms can be described by three main features: size, plication and  
155 dissection. For size, palm leaves can be as small as 15 cm in length (*Chamaedorea tuerckheimii*,  
156 Dransfield et al., 2008), as wide as 8 m (in the cospalmate *Corypha umbraculifera*; Tomlinson,  
157 2006), and as large as 25 m in length (*Raphia regalis*; Hallé, 1977). Plication refers to leaf

158 folding, leaf blades are folded like accordions as they develop, and the type of plication depends  
159 on whether the folds are on the upper (induplicate) or lower (reduplicate) ridges. Plication is  
160 highly phylogenetically conserved within subfamilies with very few exceptions; the only  
161 induplicate subfamily is Coryphoideae (except for the tribe Trachycarpeae, Fig. 1), whereas  
162 Calamoideae, Nypoideae, Ceroxyloideae, and Arecoideae are all reduplicate (Dransfield et al.,  
163 2008). Finally, palm leaves are either entire or dissected. Dissected leaves usually form from  
164 entire blades as they develop and can be pinnate, palmate or costapalmate depending on the  
165 length of the leaf rachis and the presence of a costa (an extension of the leaf axis; Dransfield et  
166 al., 2008). Interestingly, some palm species are polymorphic (within-species leaf shape variation  
167 in which individuals have either entire or dissected leaves), but in such cases, polymorphism  
168 only involves entire and pinnate shapes. For the latter, it is worth noting that genomic analyses  
169 (e.g. Loiseau et al., 2019) have confirmed that at least some of them represent true  
170 polymorphism within populations rather than issues of taxonomy with different taxa currently  
171 grouped under one species name being polymorphic.

172

173         Based on the information available on Genera Palmarum II (Dransfield et al., 2008) and  
174 PalmWeb (<http://www.palmweb.org/>, last consulted in October 2019), we classified all species  
175 into “entire”, “pinnate”, “bipinnate”, “palmate” (costapalmate and palmate), and “polymorphic”  
176 categories, depending on their leaf shape. We merged the costapalmate and palmate shapes  
177 because their leaf blades are highly similar and only differ in the costa. We removed the  
178 bipinnate shape category from all analyses because the category includes only 14 out of the 2550  
179 species. Of the species included, the large majority are pinnate (67.7%, Supporting Information  
180 Table S1), followed by palmate and entire (22.19% and 5.5% respectively). Only 75 (3.87%)  
181 species are polymorphic. They were included in the ancestral state estimation analyses but  
182 excluded from the GLMMs because they cannot be assigned to a unique shape category in our  
183 models (Supporting Information Table S2).

184

#### 185 *Palm allometry data*

186         We annotated all species using the data in Palm\_Traits v.1 (Kissling et al., 2019) and  
187 scored maximum leaf number, maximum petiole length, plant height, and blade length variables.  
188 We calculated plant height by adding the variables ‘MaxStemHeight\_m’,

189 ‘Max\_Petiole\_length\_m’ and ‘Max\_Blade\_Length\_m’, with ‘MaxStemHeight\_m’ set to zero for  
190 acaulescent species. We could annotate 47-77% of the species in the phylogeny depending on the  
191 variable. Species without annotations were either not annotated in Palm\_Traits v.1 or were  
192 climbing species (465 species, Supporting Information Table S3); the latter removed because  
193 their life strategies differ from the rest of palms and their stem height is not readily comparable.

194

#### 195 *Climatic and ecoregion data*

196 We downloaded 885,130 occurrences of palm species from GBIF (last consulted, January  
197 2019), from which we excluded fossil occurrences and data with missing coordinates. We used  
198 the R package *CoordinateCleaner* (Zizka et al., 2019) to remove duplicate coordinates per  
199 species, records nearby science institutions, coordinates on bodies of water, and coordinates in  
200 city/country centroids, all using a buffer of 5000 m). We further used a custom Python script  
201 ([https://github.com/mftorres/palm\\_leaf](https://github.com/mftorres/palm_leaf)) and the World Geographical Scheme for Recording  
202 Plant Distributions maps (TDWG; Brummitt, 2001) to remove species coordinates falling outside  
203 the botanical countries listed as their native areas in the WCSP database. We obtained 56,372  
204 clean coordinate records representing 70% of the species (Supporting Information Table S4),  
205 which we used to extract all WorldClim1.4 climatic variables with *dismo* v1.1.4 (Hijmans et al.,  
206 2017) and *ade4* v1.7.15 (Dray & Dufour., 2007), both R packages (R Core Team, 2018). We  
207 used the extracted WorldClim1.4 data to estimate the de Martonne’s Aridity Index (de Martonne,  
208 1925) for each record as the annual precipitation in mm divided by the mean annual temperature  
209 in Celsius + 10. Finally, we estimated the species medians for every climatic variable from  
210 which we could extract the information.

211

212 After annotating climatic and allometric variables for 1212 to 1439 species out of the  
213 2550 species in the phylogeny (depending on record and data availability), we examined the  
214 correlation between variables and chose for the models the variables with a Spearman’s  
215 coefficient  $< 0.7$  (Supporting Information Fig. S1). We additionally estimated the variance  
216 inflation factor for all variables using the function *vif* and removed those above a threshold of 0.7  
217 (USDM v1.1.18; Naimi, 2015). We chose five climatic and two allometric variables: mean  
218 annual temperature ( $^{\circ}\text{C}$ ), temperature seasonality ( $\sigma*100$ ), annual precipitation (mm);  
219 precipitation seasonality ( $\sigma*100$ ), aridity ( $\text{mm}/^{\circ}\text{C}$ ), maximum leaf number, and plant height (m).

220 For our palm data, other climatic variables that we do not include in the models (like the  
221 maximum and minimum temperature/precipitation of the warmest month) had a high Spearman's  
222 correlation coefficient ( $> 0.7$ ) to one or a few of the variables selected (Supporting Information  
223 Fig. S1). Annual precipitation and aridity were highly correlated (Spearman's correlation  
224 coefficient = 0.9; Supporting Information Fig. S1); however, because water stress increases the  
225 damaging effect of high temperatures and can be a selective pressure for leaf shape, we removed  
226 aridity from models that included precipitation and vice versa. Similarly, plant height was highly  
227 correlated with the understory/canopy trait and we kept plant height as a proxy for  
228 understory/canopy from here on. All variables included in the models were  $\log^{10}$ -transformed  
229 (with the exception of mean annual temperature) and standardized to have zero mean and a  
230 standard deviation of one (Supporting Information Table S4). Finally, we annotated the species  
231 ecoregions based on Olson et al. (2001) and as described in Cássia-Silva et al. (2019).

232

### 233 *Generalized linear mixed models*

234 We fit a series of GLMMs using all selected variables (except for aridity and annual  
235 precipitation, see Results), removing one variable in each iteration, to evaluate the effect. We  
236 used logistic regressions to distinguish the variables associated with leaf shape using a series of  
237 pairwise comparisons; pinnate (0) vs. palmate (1), entire (0) vs. palmate (1), and entire (0) vs.  
238 pinnate (1). All regressions were done using Bayesian phylogenetic logistic regressions  
239 implemented in the R package *MCMCglmmRAM* (Hadfield, 2015). For computational  
240 constraints, we ran every model on 42 (Adams, 1979) phylogenies randomly selected from the  
241 distribution of phylogenies generated by Faurby et al. (2016) and updated in Hill et al. (2021),  
242 setting them as a random effect. For every model on the 42 phylogenies, we ran two independent  
243 chains of 10,000,000 iterations each, with a thinning of 8,000, and a burn-in of 10% of the  
244 sampling. Analyses were run at the Chalmers University of Technology cluster through the  
245 Swedish National Infrastructure for Computing (SNIC; Gothenburg, Sweden). We ran the  
246 models until the chains converged, here defined as effective sampling sizes for all variables  
247 higher than 100, and autocorrelation between values lower than 0.2. We evaluated the  
248 significance of the effects for every predictor variable based on whether the 2.5 and 97.5%  
249 quartiles of the estimated density overlapped zero (Supporting Information Table S5).

250

251 *Ancestral state estimation*

252         In order to select an appropriate model for the ancestral trait estimation, we first used the  
253 Multi-State Speciation and Extinction (MuSSE) model from the R package *diversitree* (FitzJohn,  
254 2012) to compare speciation, extinction, and transition rates between leaf shapes. We adjusted  
255 the leaf shape dataset to ensure we had enough power to estimate parameters: 1) We did not  
256 include plication in the analyses due to its high phylogenetic clustering (Fig. 1; but see the  
257 discussion about how all folded palmate leaves across plants are similar due to leaf folding inside  
258 the bud in Couturier et al., 2011); 2) we created a “polymorphic” category for species exhibiting  
259 more than one shape. 3) We excluded all species for which leaf shape information was  
260 unavailable from the analyses. This resulted in a dataset containing 2543 species and four  
261 character states: palmate (costapalmate + palmate), pinnate, entire and polymorphic.  
262 Polymorphism only includes those species that have both pinnate and entire leaves, but never  
263 palmate or costapalmate leaves. Hence, when designing the MuSSE models we assumed direct  
264 transitions between palmate leaves and polymorphic states (pinnate + entire) to be impossible  
265 and therefore constrained the corresponding transition parameters to zero. Because of the large  
266 number of parameters for the MuSSE model remaining (18 parameters, Supporting Information  
267 Fig. S2), we selected the best-fitting model using a backward model selection procedure on the  
268 maximum clade credibility tree only. We started fitting a model in which all remaining  
269 parameters were unconstrained, using maximum likelihood estimation (ML). We then proceeded  
270 with reducing the model, one constraint at a time until the AIC score did not improve. At each  
271 step, all models with one more constraint than the previous (more complex) model were fitted  
272 and ranked according to their AIC scores. The model with the lowest AIC score was retained as  
273 the base model for the next step, providing it was significantly lower ( $\Delta AIC > 2$ ) than the best  
274 model from the previous step. Using the best-fitting model as determined above, we performed  
275 an MCMC analysis to compare posterior distributions of parameters. We ran the MCMC for  
276 10,000,000 generations, sampling every 8,000 generations and a burnin of 1,100. We used the  
277 ML parameter estimation as starting points for the MCMC. AIC scores for determining the best  
278 MuSSE models stopped improving at the tenth step during the backward model selection  
279 procedure, representing 315 models, of which six did not converge.

280

281 We used the best-fitting MuSSE model to estimate ancestral states across the tree. Based  
282 on this ancestral state estimation we estimated the number and rate of transitions through time as  
283 well as the relative frequency of lineages of each leaf type through time. To do so, we sampled  
284 states at nodes 100 times, using the relative probabilities of leaf shape estimated for each node as  
285 sampling probabilities. For each iteration, at each branch where a state transition occurred we  
286 sampled a random timing from a uniform distribution for the event along that branch. Finally, for  
287 each iteration, we counted the number of transitions happening within a 5 million year sliding  
288 window to obtain the number of state transitions through time. We calculated the rate of  
289 transition through time by dividing the number of transitions by the sum of branch lengths within  
290 each time interval. We repeated the procedure for one iteration out of the 100, but instead of  
291 calculating the number of transitions, we calculated the relative frequency of lineages exhibiting  
292 each type of leaf shape through time. Finally, we compared the relative shape frequency through  
293 time with the global temperature change scale computed for an ice-free ocean extrapolated by  
294 Condamine et al. (2020) and based on data from Zachos et al. (2001).

295

### 296 **3. Results**

#### 297 *Leaf shape and climate*

298 Palms are widely distributed across climatic gradients (except for habitats where extreme  
299 frost occurs). However, leaf shapes are not distributed evenly throughout the geographic  
300 distribution of the palm family (Figs. 1 and S7-10). The distribution of pinnate and palmate  
301 species extends farther from the equator into areas of substantial water scarcity and regular  
302 exposure to extreme temperatures. These areas include the tropical and subtropical moist and dry  
303 broadleaf forests, temperate forests, grasslands and savannahs, and desert and xeric shrublands  
304 (Supporting Information Fig. S10). Meanwhile, the distribution of entire-leaved species is  
305 concentrated in tropical areas near the equator where annual temperature and precipitation are  
306 more constant. We observe a similar pattern for all climatic variables considered here, in which  
307 the species median distributions of pinnate and palmate species are wider than the species  
308 median distributions of species with entire leaves (Supporting Information Fig. S3 and Table  
309 S6). For mean annual temperatures for example, pinnate species range between 12.8°C and  
310 27.7°C (14.9°C difference), palmates range between 13.8°C and 28.1°C (14.3°C difference), and  
311 species with entire leaves range between 14.1°C and 27°C (12.9°C difference). However, the



312 median of the distribution for mean annual temperatures is higher for palmate (25.1°C), then  
313 entire (24.6°C), and lowest for pinnate species (23.7°C).

314

315 The GLMMs identified a strong association between temperature and dissection when  
316 considering entire and pinnate shapes and a less clear pattern when considering palmate in  
317 combination with the other two shapes. When comparing entire versus pinnate shapes, the model  
318 including all variables showed a significant positive association between mean annual  
319 temperature and pinnate shape ( $P = 0.002$ ). That means that high mean annual temperatures  
320 make the pinnate shape more likely. The significance of the positive association persists even  
321 when only climatic variables are considered (Figs. 2a and S4). When the model included one  
322 climatic and one allometric variable, both had a significant association with pinnate shape.  
323 However, when models included only a single variable, the only one that had a significant  
324 positive association with pinnate shape was temperature seasonality ( $P = 0.001$ , Figs. 2c and S4).

325

326 When comparing pinnate versus palmate, none of the variables were significant when  
327 they were all included in the same model. However, when considering only the climatic variables  
328 and none of the allometric ones, mean annual temperature was significant and had a positive  
329 association with palmate shapes ( $0.018 < P < 0.022$ ). With this, palmate shape is more likely at  
330 high mean annual temperatures, if only climate is considered. When the model included one  
331 climatic and one allometric variable, the climatic variable had a significant positive association  
332 with palmate shape (and negative with pinnate) if the allometric variable was plant height.  
333 Considering one climatic variable together with maximum leaf number resulted in a lack of  
334 significant associations (Fig. 2a). Finally, when comparing entire versus palmate shapes, none of  
335 the variables had a significant effect regardless of the model (Fig. 2a-c, Supporting Information  
336 Table S5).

337

338 No significant associations were found with precipitation and aridity unless each was  
339 included in the model together with one more variable (Figs. 2a and S4), indicating that the  
340 variation in leaf shape they explain is minimal. Precipitation and aridity had a significant and  
341 positive effect in models when the other variables are plant height (pinnate versus palmate) and  
342 leaf number (entire versus pinnate). However, the Spearman's correlation coefficient between



343 precipitation and plant height/leaf number, and those between aridity and the same two variables,  
344 were small (-0.2 in all cases except between aridity and leaf number, which is -0.3). Finally, for  
345 our data and all shape comparisons, the association between shape and temperature was not  
346 restricted to annual mean estimates but potentially extends to other variables highly correlated  
347 with mean annual temperature including the mean temperature of the coldest month, and the  
348 mean temperatures of the driest, warmest, and coldest quarter (Spearman's correlation  
349 coefficient = 0.9 for the variables mentioned; Supporting Information Fig. S1).

350

### 351 *Allometry and shape*

352 For our data, plant height was highly correlated with growth habit (Spearman's  
353 correlation coefficient = 0.8), understory versus canopy (since most palms are found in forested  
354 environments); therefore, we did not consider habit explicitly in the models. However, it is worth  
355 noting that almost all species with entire leaves live in the understory, while pinnate and palmate  
356 species live in both (Supporting Information Fig. S3). Pinnate and palmate species tend to be  
357 much larger than species with entire leaves, with median heights of 8.7 m (74.4 m max) in  
358 pinnate and 6.6 m (54.9 m max) in palmate species. In contrast, species with entire leaves have a  
359 median height of 4.9 m and a maximum height of 39 m, leaf length included in all cases.  
360 Regarding leaf number, pinnate and species with entire leaves have a similar median of 10.9  
361 leaves (and a maximum of 55 and 41 respectively) while palmate species tend to have more, with  
362 a median of 22 and a maximum of 75 leaves (*Livistona endauensis*; Kissling et al., 2019).

363

364 From the GLMMs, we only found a significant association between plant height and  
365 shape when comparing entire and pinnate shapes and the direction of the effect changed  
366 depending on which other variables were present in the model. Plant height had a significant  
367 negative association with pinnate shape when all variables were considered in the model ( $P =$   
368 0.008); however, the effect of plant height was a lot smaller than the effect of mean annual  
369 temperature (Figs. 2a-b and S4), suggesting that while high mean annual temperatures make  
370 pinnate shapes more likely, large plant height make them less likely. Moreover, the directionality  
371 of the association between plant height (or maximum leaf number) and pinnate shape varied. The  
372 association was negative when models included mean annual temperature, annual precipitation,  
373 aridity, and maximum leaf number; the effect was positive when the model included temperature

374 seasonality or precipitation seasonality (Fig. 2a). Only when the model included plant height and  
375 nothing else, did it have a significant positive association with pinnate shape ( $P = 0.008$ , Fig. 2c).

376

### 377 *Ancestral state estimation*

378 The best-fitting model (Supporting Information Fig. S2) had nine parameters and resulted  
379 from 1) merging the speciation rates for palmate, pinnate, and entire shapes; 2) merging the  
380 extinction rates for entire and polymorphic shapes; and 3) constraining six transition parameters.  
381 The resulting speciation rate of polymorphic species was more than twice higher than that of the  
382 others (Supporting Information Fig. S5). Extinction rate for the polymorphic and entire shape  
383 lineages was estimated as zero (lineage/unit of time,  $l^{-1}my^{-1}$ ). Pinnate lineages had more than  
384 twice the extinction rate of palmate lineages, which in turn was higher than the extinction rate for  
385 entire lineages. The resulting net diversification for pinnate lineages was close to zero. Palmate  
386 lineages followed with a mean net diversification estimated around  $0.1 l^{-1}my^{-1}$  and entire lineages  
387  $0.2$ . Polymorphic lineages clearly had the highest net diversification rate with a posterior  
388 distribution averaging around  $0.5 l^{-1}my^{-1}$ .

389

390 Ancestral state estimation based on the best fitting-model inferred entire leaves as the  
391 most probable state at the root (Fig. 3). Interestingly, according to our model, pinnate leaf  
392 lineages, the most common extant leaf type, originated multiple independent times from entire  
393 leaves after polymorphic transition periods. We found that the overall rate of state transitions  
394 through time remained relatively constant (Supporting Information Fig. S6). The relative  
395 frequency plot (Fig. 4) shows that entire leaves dominated during the early period of  
396 diversification, in the Late Cretaceous between 100-80 Million years ago (Mya). However, their  
397 relative frequency decreased through time at a steady rate, slowly replaced mainly by pinnate  
398 leaves since ca. 80 Mya. The first palmate lineages appeared after the pinnate lineages and their  
399 relative frequency remained approximately the same through time, averaging around  $0.1$ .

400

## 401 **4. Discussion**

402 In this study, we explore 1) the associations between leaf shape and climatic and  
403 allometric drivers whilst controlling for phylogenetic relationships 2) reconstruct the ancestral  
404 leaf shape of palms; and 3) compare shape frequencies and temperature trends through time. We

405 found that 1) temperature and not plant allometry drives leaf shape; 2) that the ancestor to all  
406 palms likely had entire leaves; 3) and that trends in shape frequency do not mirror trends in  
407 temperature through time (at least not among the lineages that survived until present day). These  
408 findings support the hypothesis that temperature and not allometry explain extant leaf shape  
409 distributions in palms and suggest shape as a potential adaptive response to heat.

410

#### 411 *Leaf dissection and climate*

412 Species with dissected leaves, especially if pinnate, are more frequent where mean annual  
413 temperatures are high (Fig. 2a). This is congruent with the wider geographic range of dissected  
414 species compared to those with entire leaves; dissected leaf species are distributed throughout the  
415 driest and most seasonal ranges where palms are found (Figs. S3 and S8-S10) and dissection is  
416 likely an advantageous trait to avoid overheating (Nicotra et al., 2007; 2008; Leigh et al., 2017).  
417 These papers note that deeply dissected palm leaves are analogous to compound or dissected  
418 leaves in eudicots. The width of each pinnae is often narrower than the width of the whole leaf,  
419 and under the same conditions, narrower leaves lose heat to the air faster and reach damaging  
420 temperatures more rarely than wider leaves. During water scarcity or in dry environments,  
421 avoiding damaging temperatures in the leaf surface is key for protecting the photosynthetic  
422 machinery. Here, dissection allows species to withstand temperature extremes, seasonal  
423 variation, and water stress (Figs. S3). In areas where water is available, like the moist forest  
424 where all shapes occur, dissection is likely less crucial and has less advantage over other shapes.

425

426 The association between temperature and dissection is not significant when entire and  
427 palmate shapes are compared (Figs. 2 and S4); there are three non-mutually exclusive  
428 explanations for this. First, the discrete shape categories in our models might not capture the  
429 continuous variation within shapes and could be insufficient for unveiling the climate-shape  
430 association. For example, palmate-shape species within *Licuala* and *Saribus* are shallowly  
431 dissected and resemble eudicot leaves with toothed margins that are closer to an entire shape.  
432 Second, anatomical traits unrelated to shape could be the key adaptations to different  
433 environments (Horn et al., 2009). The loss of non-lignified fiber bundles in the leaf mesophyll or  
434 the presence of bridge-like veins connecting the adaxial and abaxial layers of the leaf, are traits  
435 thought to be advantageous in dry environments (Kenzo et al., 2007; Horn et al., 2009). Different

436 species can evolve different strategies to respond to the same environmental challenges. Third,  
437 the correlation between climate and shape are difficult to disentangle from a phylogenetic effect  
438 due to a strong geographic structuring of related lineages, particularly in the case of the  
439 Coryphoideae subfamily to which the majority of palmate and costapalmate species belong.  
440 Models considering continuous variation and data on intra and interspecific variation in  
441 dissection depth within palmate shapes are necessary to better understand the relationship  
442 between climate and palmate shapes.

443

444 Leaf dissection and margin serration have been found to respond quickly to changes in  
445 mean annual temperature in the eudicot *Acer rubrum* (Royer et al., 2009). Similar temperature-  
446 shape associations have been explored in other eudicots (Nakayama et al., 2014; Chitwood &  
447 Shina, 2016); however, research is lacking regarding monocots and the lineage-specific  
448 mechanisms behind shape convergence across angiosperms hinders the comparisons between  
449 monocots and eudicots (Conklin et al., 2019). A better understanding of the mechanisms by  
450 which climate interacts with shape development will come from future studies addressing shape  
451 variation quantitatively (Chitwood & Sinha., 2016; Kissling et al., 2018). Quantitative trait data  
452 on leaf shape is still lacking for most palms, but data comprising intraspecific variation for some  
453 morphological traits like that published in Lenters et al (2021), open the door to more  
454 comprehensive analyses. Finally, global temperatures are likely to increase over the coming  
455 decades. This could have implications over which palm lineages are able to survive in hotter  
456 environments and which could perish. Most palm species that are currently naturalised in areas  
457 outside their native distribution are those that originated in open and dry habitats, not in moist  
458 forests (Fehr et al., 2020), and all have dissected leaf shapes. Understanding the association  
459 between climate and shape and other leaf traits, is necessary to predict potential future  
460 homogenization of palm communities in the face of climate change.

461

#### 462 *Leaf shape and plant allometry*

463 We expected plant height to influence leaf shape via allometry (large plants have large  
464 leaves that are likely dissected to avoid mechanical damage; Corner, 1949; Chazdon, 1991b).  
465 Regarding allometry, plant height has a negative effect on dissection when pinnate and entire  
466 shapes are compared, but the effect is comparatively smaller than that of mean annual

467 temperature and not observed in other models (Figs. 2 and S4). Tall heights are problematic at  
468 extremely high temperatures and water scarcity because water transport and transpiration  
469 becomes harder with increased plant height (hydraulic limitation hypothesis; Ryan & Yoder,  
470 1997; Ryan, 2006; Olson et al., 2018). Because pinnate species are more likely at high mean  
471 temperatures with potentially high water stress or seasonality in water availability, extremely tall  
472 pinnate species are at a disadvantage. However, the positive association between tall heights and  
473 dissection only appears when we account for seasonality in temperature or precipitation and  
474 nothing else. There might be interactions between mean annual temperature, plant height, and  
475 water availability for which we do not explicitly test there. Moreover, traits related with the  
476 position, lignification, and structure of cells within the leaf tissue could provide the blade with a  
477 resistance to mechanical damage that does not involve shape. This is the case for palmate and  
478 cospalmate species, which have veins arranged in a network that provides better leaf support and  
479 tolerance to hydraulic disruption (Sack et al., 2008), but data to test such effects systematically  
480 across the family are sadly not available.

481 We also expected plant height to relate to dissection via the rapid growth hypothesis  
482 (Givnish, 1978; 1984; Niinemets, 1998; Malhado et al., 2010). Malhado et al. (2010) tested this  
483 hypothesis and found an association between dissection and both low wood density and rapid  
484 diameter growth. Dissection is adaptive under favourable light conditions because producing  
485 compound or dissected leaves is physiologically less expensive than branching and thus  
486 promotes rapid vertical growth (Malhado et al., 2010). However, most palm species are  
487 monopodial and are not under the same selection forces. Moreover, Malhado and coauthors  
488 (2010) excluded all palms from their analyses and we cannot directly compare our results with  
489 theirs.

490

#### 491 *Leaf shape evolution*

492 We found that dissected leaf shapes evolved frequently during the history of palms, a  
493 result consistent with previous research (Fig. 3). Using 178 taxa with pinnate or palmate species  
494 only, Horn et al. (2009) reached the identical conclusion that shape is homoplasious and changes  
495 between states fast.

496 According to our model and data available, early crown lineages of palms had entire  
497 leaves, while palmate and pinnate shapes appeared later multiple times independently. The

498 earliest reliably dated and identified leaf fossil known to this day is that of *Sabalites carolinensis*  
499 from the Santonian-Campanian (fossil dating from 86-82 Mya), which exhibits a costapalmate  
500 shape (Berry, 1914). However, the oldest estimated appearance of palmate and costapalmate  
501 lineages occurred between 78-80 Mya and most likely corresponds to the stem of Coryphoideae,  
502 slightly more recent than *S. carolinensis*. The earliest pinnate fossil appeared during the  
503 Campanian (fossil date 76-70 Mya; Dransfield et al., 2008). According to our ancestral  
504 estimation, the first pinnate leaves appeared with the emergence of polymorphic lineages  
505 approximately 85 Mya, predating the oldest pinnate fossil. Fossils remain rare and provide at  
506 best a minimum age for any taxon or morphological character; the absence of old fossils  
507 exhibiting entire shapes is surprising and is explained either by the incomplete nature of the  
508 fossil record or by our ancestral state estimation of leaf evolution. We note however that the  
509 mismatch between the age of the palmate fossils and the emergence of its shape lineage can  
510 result from the uncertainty around the time estimates in the phylogeny we used.

511         One interesting outcome of our model and ancestral state estimation is the role played by  
512 polymorphic lineages. Polymorphism, which only concerns combinations of entire and pinnate  
513 shapes, appears as a transitional state between these two shapes forming an evolutionary bridge  
514 between ancestral lineages with non-polymorphic leaf shapes. Maximum Likelihood estimates of  
515 transition parameters also indicate that there is a strong directionality; the highest transition rates  
516 being from polymorphic toward pinnate shapes, the second highest was by transitions from entire  
517 shapes towards polymorphism. As a result, polymorphic lineages are maintained in our ancestral  
518 state estimation at a constant proportion of about 20% of all palm lineages throughout the history  
519 of palm (although extant polymorphic species are around 3%). We also found that pinnate,  
520 palmate, and entire lineages do not have significantly different speciation rates but polymorphic  
521 lineages have an estimated speciation rate about five times higher than the others. In terms of  
522 extinction however, pinnate lineages have the highest rate, followed by palmate and finally entire  
523 and polymorphic lineages. These results suggest that the high number of extant pinnate lineages  
524 do not result from high diversification rates, but from a high speciation rate of polymorphic  
525 lineages combined with a high rate of independent transitions towards pinnate leaves.

526

527 *Leaf shape through time*



528           The first non-polymorphic pinnate lineages appeared only during the Cretaceous-  
529 Paleogene transition period (Fig. 4). At that time, palms were dominated by entire leaves (70%  
530 of lineages), and remained so until the Eocene-Oligocene transition period. The late Cretaceous  
531 and the early Paleogene were periods of high global temperatures, with ever-wet tropical areas  
532 distributed towards high latitudes. Palms thrived during this period forming the *Palmae Province*  
533 that covered South America, Africa and India (Pan et al., 2006). The large extent of warm and  
534 humid conditions may have promoted the initial diversification of entire leaves during the early  
535 period of palms diversification.

536           During the Eocene and the Oligocene however, pinnate shapes rapidly became dominant  
537 (Fig. 4). At the end of the Eocene, pinnate lineages represented about 40% of the lineages and  
538 20% were entire. During the Eocene, global temperatures decreased at a relatively fast pace. The  
539 increasing dominance of pinnate leaves during this period of global cooling refutes the  
540 hypothesis that pinnate lineages would thrive during periods of warmer climate. We did not  
541 identify a period of fast sudden evolutionary changes, also refuting the idea that a specific and  
542 short event drove the evolutionary changes in leaf configuration.

543           We suggest that the turnover in leaf shapes was not a response to temperature variation  
544 only but took place in the context of global climate and habitat changes happening throughout  
545 the Cenozoic. Past the late Cretaceous and Paleocene during which palms reached their  
546 maximum extent (Bogotá-Ángel et al., 2021), ever-wet forests started to contract toward lower  
547 latitudes. Kissling et al. (2012) showed that the distribution of tropical rainforests only declined  
548 during the last 50 My and in all tropical regions simultaneously. After the Early Eocene Climate  
549 Optimum (47 Mya) and around the Eocene-Oligocene Transition (34 Mya), temperature and  
550 wetness decreased at northern high latitudes (Pound & Salzmann, 2017; Hutchinson et al., 2021).  
551 Seasonality at high latitudes also increased (Eldrett et al., 2009) and drier and temperate  
552 environments expanded at the expense of tropical rainforests (Graham, 2011; Morley, 2011). As  
553 such, pinnate lineages may have repeatedly evolved and diversified as a response to these new  
554 conditions, which selected for palms adapted to drier environments, at least during parts of the  
555 year (Cássia-Silva et al, 2019). The first occurrence of pinnate (ca. 80 Mya) and palmate shapes  
556 (ca. 70 Mya) both predate the assemblage of dry forests (30-20 Mya; Becerra et al., 2005) and  
557 savannahs (10 Mya; Pennington et al., 2006). Currently, palms with pinnate or palmate shapes



558 are found in dry and seasonal ecoregions such as the Tropical and Subtropical dry forests,  
559 temperate regions, savannas, and deserts – all ecoregions in which species with entire leaves are  
560 not present (Supporting Information Fig. S10).

561

## 562 **Conclusion**

563 We explored the drivers of leaf shape evolution in palms by testing for associations  
564 between shape and current climatic and allometric variables, and by reconstructing the evolution  
565 of shape throughout palm evolutionary history. We highlight the importance of considering  
566 biotic and abiotic factors when studying the evolution of plant traits. In the case of palms, we  
567 found that mean annual temperature is associated with leaf dissection. A small negative effect of  
568 plant height on dissection may result from the inefficiency of large plant heights in high  
569 temperatures due to water transport constraints. The ancestral state to all extant palms is inferred  
570 as entire, from which pinnate shapes emerged via polymorphic states (species with both entire  
571 and pinnate individuals) and became more frequent. Palmate species emerged from entire states  
572 and their frequency remained constant. Palms are important representative taxa of the tropical  
573 forests with more than 2,500 species distributed globally. Thus, exploring how its leaf shape  
574 diversity emerged contributes to our understanding of shape and its adaptive potential, especially  
575 in light of increasing climatic change and temperature extremes.

576

## 577 **Acknowledgements**

578 We acknowledge the logistic and computational support provided by the Swedish National  
579 Infrastructure for Computing via the allocated projects SNIC2020-7-61 and 2020-8-85. MFT and  
580 CDB acknowledge financial support from the Swedish Research Council (2017-04980). This  
581 study was financed in part by the Coordenação de Aperfeiçoamento de Pessoal de Nível Superior  
582 - Brasil (CAPES) - Finance Code 001 to TE. AA acknowledges financial support from the  
583 Swedish Research Council (2019-05191), the Swedish Foundation for Strategic Research  
584 (FFL15-0196), and the Royal Botanic Gardens, Kew. SF is funded by the Swedish Research  
585 Council (#2017-03862). The research presented in this paper is a contribution to the strategic  
586 research area Biodiversity and Ecosystems in a Changing Climate, BECC.

587

588

## **REFERENCES**

- 589  
590 **Adams D. 1979.** The Hitchhiker's Guide to the Galaxy. London, UK: Pan Books.
- 591 **Becerra JX. 2005.** Timing the origin and expansion of the Mexican tropical dry forest.  
592 *Proceedings of the National Academy of Sciences* **102**(31): 10919-10923.
- 593 **Berry EW. 1914.** The upper Cretaceous and Eocene floras of South Carolina and Georgia (No.  
594 84). US: US Government Printing Office.
- 595 **Blein T, Hasson A, Laufs P. 2010.** Leaf development: what it needs to be complex. *Current*  
596 *Opinion in Plant Biology* **13**(1): 75-82.
- 597 **Bogotá-Ángel G, Huang H, Jardine PE, Chazot N, Salamanca S, Banks H, Pardo-Trujillo**  
598 **A, Plata A, Dueñas H, Star W, Langelaan R, 2021.** Climate and geological change as  
599 drivers of Mauritiinae palm biogeography. *Journal of Biogeography* **48**(5): 1001-1022.
- 600 **Brown VK, Lawton JH. 1991.** Herbivory and the evolution of leaf size and shape.  
601 *Philosophical Transactions of the Royal Society of London. Series B: Biological Sciences*  
602 **333**(1267): 265-272.
- 603 **Brummitt RK. 2001.** World Geographical Scheme for Recording Plant Distributions, Edition 2.  
604 Biodiversity Information Standards (TDWG) <http://www.tdwg.org/standards/109>
- 605 **Campitelli BE, Stehlik I, Stinchcombe JR. 2008.** Leaf variegation is associated with reduced  
606 herbivore damage in *Hydrophyllum virginianum*. *Botany* **86**(3): 306-313.
- 607 **Chazdon RL. 1985.** Leaf display, canopy structure, and light interception of two understory  
608 palm species. *American Journal of Botany* **72**(10): 1493-1502.
- 609 **Chazdon RL. 1986.** The costs of leaf support in understory palms: economy versus safety. *The*  
610 *American Naturalist* **127**(1): 9-30.
- 611 **Chazdon RL. 1991a.** Effects of leaf and ramet removal on growth and reproduction of *Geonoma*  
612 *congesta*, a clonal understory palm. *The Journal of Ecology* **79**(4):1137-1146.
- 613 **Chazdon RL. 1991b.** Plant size and form in the understory palm genus *Geonoma*: are species  
614 variations on a theme?. *American Journal of Botany* **78**(5): 680-694.
- 615 **Chitwood DH, Sinha NR. 2016.** Evolutionary and environmental forces sculpting leaf  
616 development. *Current Biology* **26**(7): R297-R306.
- 617 **Condamine FL, Silvestro D, Koppelhus EB, Antonelli A. 2020.** The rise of angiosperms  
618 pushed conifers to decline during global cooling. *Proceedings of the National Academy*  
619 *of Sciences* **117**(46): 28867-28875.

- 620 **Conklin PA, Strable J, Li S, Scanlon MJ. 2019.** On the mechanisms of development in  
621 monocot and eudicot leaves. *New Phytologist* **221**(2): 706-724.
- 622 **Corner EJH. 1949.** The durian theory or the origin of the modern tree. *Annals of Botany* **13**(52):  
623 367-414.
- 624 **Couturier E, Du Pont SC, Douady S. 2011.** The filling law: a general framework for leaf  
625 folding and its consequences on leaf shape diversity. *Journal of Theoretical Biology* **289**:  
626 47-64.
- 627 **Cássia-Silva C, Freitas CG, Alves DM, Bacon CD, Collevatti RG. 2019.** Niche conservatism  
628 drives a global discrepancy in palm species richness between seasonally dry and moist  
629 habitats. *Global Ecology and Biogeography* **28**(6): 814-825.
- 630 **De Martonne E. 1925.** *Traité de Géographie Physique*. Quatrième édition. Paris, France: A.  
631 Colin.
- 632 **Dransfield J, Uhl NW, Asmussen CB, Baker WJ, Harley MM, Lewis CE. 2008.** *Genera*  
633 *palmarum, the evolution and classification of palms*. Richmond, Surrey UK: Royal  
634 Botanic Gardens, Kew.
- 635 **Dray S, Dufour AB. 2007.** The ade4 package: implementing the duality diagram for ecologists.  
636 *Journal of Statistical Software* **22**(4), pp.1-20.
- 637 **Eldrett JS, Greenwood DR, Harding IC, Huber M. 2009.** Increased seasonality through the  
638 Eocene to Oligocene transition in northern high latitudes. *Nature* **459**(7249): 969-973.
- 639 **Faurby S, Eiserhardt WL, Baker WJ, Svenning JC. 2016.** An all-evidence species-level  
640 supertree for the palms (Arecaceae). *Molecular Phylogenetics and Evolution* **100**: 57-69.
- 641 **Fehr V, Buitenwerf R, Svenning JC. 2020.** Non-native palms (Arecaceae) as generators of  
642 novel ecosystems: A global assessment. *Diversity and Distributions* **26**(11): 1523-1538.
- 643 **FitzJohn RG. 2012.** Diversitree: comparative phylogenetic analyses of diversification in R.  
644 *Methods in Ecology and Evolution* **3**(6): 1084-1092.
- 645 **Gates DM. 1968.** Transpiration and leaf temperature. *Annual Review of Plant Physiology* **19**(1):  
646 211-238.
- 647 **the Global Biodiversity Information Facility - GBIF.org.** GBIF Occurrence Download  
648 <https://doi.org/10.15468/dl.rjmqfy> retrieved on 31 January 2019.

- 649 **Givnish TJ. 1978.** On the adaptive significance of compound leaves, with particular reference to  
650 tropical trees. In: P.B. Tomlinson and M.H. Zimmerman eds. *Tropical trees as living*  
651 *systems*. Cambridge, UK: Cambridge University Press, 351–380.
- 652 **Givnish TJ. 1979.** On the adaptive significance of leaf form. Topics. In: O.T. Solbrig, G.B. Jain,  
653 G.B. Johnson and P.H. Raven eds. *Plant Population Biology*. New York, US: Columbia  
654 University Press, 375-407.
- 655 **Givnish TJ. 1984.** Leaf and canopy adaptations in tropical forests. In: E. Medina, H.A. Mooney  
656 and C. Vásquez-Yánes eds. *Physiological ecology of plants in the wet tropics. Tasks for*  
657 *vegetation Science, vol 12*. Dordrecht, Netherlands: Springer, 51–84.
- 658 **Givnish TJ. 1987.** Comparative studies of leaf form: assessing the relative roles of selective  
659 pressures and phylogenetic constraints. *New phytologist* **106**: 131-160.
- 660 **Givnish TJ. 1990.** Leaf mottling: relation to growth form and leaf phenology and possible role  
661 as camouflage. *Functional Ecology* **4**(4): 463-474.
- 662 **Govaerts R, Dransfield J, Zona S, Hodel DR, Henderson A. 2020.** World Checklist of  
663 Arecaceae. Facilitated by the Royal Botanic Gardens, Kew. Published on the Internet;  
664 <http://wmsp.science.kew.org/> Retrieved 25 February 2020
- 665 **Graham A. 2011.** The age and diversification of terrestrial New World ecosystems through  
666 Cretaceous and Cenozoic time. *American Journal of Botany* **98**(3): 336-351.
- 667 **Gunawardena AH, Greenwood JS, Dengler NG. 2004.** Programmed cell death remodels lace  
668 plant leaf shape during development. *The Plant Cell* **16**(1): 60-73.
- 669 **Gurevitch J, Schuepp PH. 1990.** Boundary layer properties of highly dissected leaves: an  
670 investigation using an electrochemical fluid tunnel. *Plant, Cell & Environment* **13**(8):  
671 783-792.
- 672 **Hadfield JD. 2015.** Increasing the efficiency of MCMC for hierarchical phylogenetic models of  
673 categorical traits using reduced mixed models. *Methods in Ecology and Evolution* **6**(6),  
674 pp.706-714.
- 675 **Hallé R. 1977.** The longest leaf in palms? *Principes* **21**: 18.
- 676 **Henderson A. 2002.** Evolution and Ecology of Palms. New York: NYBG Press.
- 677 **Hijmans RJ, Phillips S, Leathwick J, Elith J. 2017.** dismo: Species distribution modeling. *R*  
678 *package version* **1**(4): 1-1.

- 679 **Hill A, Torres Jimenez MF, Chazot N, Cássia-Silva C, Faurby S, Bacon CD. 2021.**  
680 Determining the interaction between fruit colour and range size on diversification.  
681 *bioRxiv*. unpublished.
- 682 **Horn JW, Fisher JB, Tomlinson PB, Lewis CE, Laubengayer K. 2009.** Evolution of lamina  
683 anatomy in the palm family (Arecaceae). *American Journal of Botany* **96**(8): 1462-1486.
- 684 **Hutchinson DK, Coxall HK, Lunt DJ, Steinthorsdottir M, De Boer AM, Baatsen M, von**  
685 **der Heydt A, Huber M, Kennedy-Asser AT, Kunzmann L, Ladant JB. 2021.** The  
686 Eocene–Oligocene transition: a review of marine and terrestrial proxy data, models and  
687 model–data comparisons. *Climate of the Past* **17**(1): 269-315.
- 688 **Jouannic J, Collin M, Vidal B, Verdeil JL, Tregear JW. 2007.** A class I KNOX gene from the  
689 palm species *Elaeis guineensis* (Arecaceae) is associated with meristem function and a  
690 distinct mode of leaf dissection. *New Phytologist* **174**: 551-568
- 691 **Kenzo T, Ichie T, Watanabe Y, Hiromi T. 2007.** Ecological distribution of homobaric and  
692 heterobaric leaves in tree species of Malaysian lowland tropical rainforest. *American*  
693 *Journal of Botany* **94**(5): 764-775.
- 694 **Kidner CA, Umbreen S. 2009.** Why is leaf shape so variable? *International Journal of Plant*  
695 *Developmental Biology* **4**:64-75.
- 696 **Kissling WD, Balslev H, Baker WJ, Dransfield J, Gödel B, Lim JY, Onstein RE, Svenning**  
697 **JC. 2019.** PalmTraits 1.0, a species-level functional trait database of palms worldwide.  
698 *Scientific Data* **6**(1): 1-13.
- 699 **Kissling WD, Eiserhardt WL, Baker WJ, Borchsenius F, Couvreur TL, Balslev H,**  
700 **Svenning JC, 2012.** Cenozoic imprints on the phylogenetic structure of palm species  
701 assemblages worldwide. *Proceedings of the National Academy of Sciences* **109**(19):  
702 7379-7384.
- 703 **Kissling WD, Walls R, Bowser A, Jones MO, Kattge J, Agosti D, Amengual J, Basset A,**  
704 **Van Bodegom PM, Cornelissen JH, Denny EG. 2018.** Towards global data products of  
705 Essential Biodiversity Variables on species traits. *Nature Ecology & Evolution* **2**(10):  
706 1531-1540.
- 707 **Leigh A, Sevanto S, Close JD, Nicotra AB. 2017.** The influence of leaf size and shape on leaf  
708 thermal dynamics: does theory hold up under natural conditions? *Plant, cell &*  
709 *environment* **40**(2): 237-248.

- 710 **Lenters TP, Henderson A, Dracxler CM, Elias GA, Kamga SM, Couvreur TL, Kissling**  
711 **WD. 2021.** Integration and harmonization of trait data from plant individuals across  
712 heterogeneous sources. *Ecological Informatics* **62**:101206.
- 713 **Loiseau O, Olivares I, Paris M, de La Harpe M, Weigand A, Koubínová D, Rolland J,**  
714 **Bacon CD, Balslev H, Borchsenius F, Cano A. 2019.** Targeted capture of hundreds of  
715 nuclear genes unravels phylogenetic relationships of the diverse Neotropical palm tribe  
716 Geonomateae. *Frontiers in Plant Science* **10**:864.
- 717 **Malhado AC, Whittaker RJ, Malhi Y, Ladle RJ, Ter Steege H, Phillips O, Aragão LEOC,**  
718 **Baker TR, Arroyo L, Almeida S, Higuchi N. 2010.** Are compound leaves an adaptation  
719 to seasonal drought or to rapid growth? Evidence from the Amazon rain forest. *Global*  
720 *Ecology and Biogeography* **19**(6): 852-862.
- 721 **Marcysiak K. 2012.** Variation of leaf shape of *Salix herbacea* in Europe. *Plant Systematics and*  
722 *Evolution* **298**(8): 1597-1607.
- 723 **Morley RJ. 2011.** Cretaceous and Tertiary climate change and the past distribution of  
724 megathermal rainforests. In: J. Flenley and M. Bush eds. *Tropical rainforest responses to*  
725 *climatic change*. Berlin, Germany: Springer, 1-34.
- 726 **Naimi B. 2015.** USDM: Uncertainty analysis for species distribution models. *R package version*  
727 **1**:1–15.
- 728 **Nakayama H, Nakayama N, Seiki S, Kojima M, Sakakibara H, Sinha N, Kimura S. 2014.**  
729 Regulation of the KNOX-GA gene module induces heterophyllic alteration in North  
730 American lake cress. *The Plant Cell* **26**(12): 4733-4748.
- 731 **Nardini A, Luglio J. 2014.** Leaf hydraulic capacity and drought vulnerability: possible trade-  
732 offs and correlations with climate across three major biomes. *Functional Ecology* **28**(4):  
733 810-818.
- 734 **Nicotra AB, Cosgrove MJ, Cowling A, Schlichting CD, Jones CS. 2008.** Leaf shape linked to  
735 photosynthetic rates and temperature optima in South African *Pelargonium* species.  
736 *Oecologia* **154**(4): 625-635.
- 737 **Nicotra AB, Hermes JP, Jones CS, Schlichting CD. 2007.** Geographic variation and plasticity  
738 to water and nutrients in *Pelargonium australe*. *New Phytologist* **176**(1): 136-149.



- 739 **Nicotra AB, Leigh A, Boyce CK, Jones CS, Niklas KJ, Royer DL, Tsukaya H. 2011.** The  
740 evolution and functional significance of leaf shape in the angiosperms. *Functional Plant*  
741 *Biology* **38**(7): 535-552.
- 742 **Niinemets Ü. 1998.** Are compound-leaved woody species inherently shade-intolerant? An  
743 analysis of species ecological requirements and foliar support costs. *Plant Ecology*  
744 **134**(1): 1-11.
- 745 **Niklas KJ. 1992.** Petiole mechanics, light interception by lamina, and “economy in design”.  
746 *Oecologia* **90**(4): 518-526.
- 747 **Olson DM, Dinerstein E, Wikramanayake ED, Burgess ND, Powell GV, Underwood EC,**  
748 **D'amico JA, Itoua I, Strand HE, Morrison JC, Loucks CJ. 2001.** Terrestrial  
749 Ecoregions of the World: A New Map of Life on Earth. A new global map of terrestrial  
750 ecoregions provides an innovative tool for conserving biodiversity. *BioScience* **51**(11):  
751 933-938.
- 752 **Olson ME, Soriano D, Rosell JA, Anfodillo T, Donoghue MJ, Edwards EJ, León-Gómez C,**  
753 **Dawson T, Martínez JJC, Castorena M, Echeverría A. 2018.** Plant height and  
754 hydraulic vulnerability to drought and cold. *Proceedings of the National Academy of*  
755 *Sciences* **115**(29): 7551-7556.
- 756 **Pan AD, Jacobs BF, Dransfield J, Baker WJ. 2006.** The fossil history of palms (Arecaceae) in  
757 Africa and new records from the Late Oligocene (28–27 Mya) of north-western Ethiopia.  
758 *Botanical Journal of the Linnean Society* **151**(1): 69-81.
- 759 **Pennington RT, Ratter JA. 2006.** Neotropical savannas and seasonally dry forests: plant  
760 diversity, biogeography, and conservation. Florida, US: CRC press.
- 761 **Peppe DJ, Royer DL, Cariglino B, Oliver SY, Newman S, Leight E, Enikolopov G,**  
762 **Fernandez-Burgos M, Herrera F, Adams JM, Correa E. 2011.** Sensitivity of leaf size  
763 and shape to climate: global patterns and paleoclimatic applications. *New phytologist*  
764 **190**(3): 724-739.
- 765 **Piazza P, Bailey CD, Cartolano M, Krieger J, Cao J, Ossowski S, Schneeberger K, He F, de**  
766 **Meaux J, Hall N, MacLeod N. 2010.** *Arabidopsis thaliana* leaf form evolved via loss of  
767 KNOX expression in leaves in association with a selective sweep. *Current Biology*  
768 **20**(24): 2223-2228.



- 769 **Pound MJ, Salzmann U. 2017.** Heterogeneity in global vegetation and terrestrial climate  
770 change during the late Eocene to early Oligocene transition. *Scientific Reports* **7**(1): 1-12.
- 771 **R Core Team. 2018.** R: A language and environment for statistical computing. R Foundation for  
772 Statistical Computing, Vienna, Austria. <https://www.R-project.org/>.
- 773 **Renninger HJ, Phillips NG. 2016.** Palm physiology and distribution in response to global  
774 environmental change. In: Goldstein G., Santiago L. eds. *Tropical tree physiology*. Cham,  
775 Switzerland. Springer, 67-101
- 776 **Rivero-Lynch AP, Brown VK, Lawton JH. 1996.** The impact of leaf shape on the feeding  
777 preference of insect herbivores: experimental and field studies with *Capsella* and  
778 *Phyllotreta*. *Philosophical Transactions of the Royal Society of London. Series B:*  
779 *Biological Sciences* **351**(1348): 1671-1677.
- 780 **Royer DL, Meyerson LA, Robertson KM, Adams JM. 2009.** Phenotypic plasticity of leaf  
781 shape along a temperature gradient in *Acer rubrum*. *PloS one* **4**(10): e7653.
- 782 **Ryan MG, Yoder BJ. 1997.** Hydraulic limits to tree height and tree growth. *Bioscience* **47**(4):  
783 235-242.
- 784 **Ryan MG, Phillips N, Bond BJ. 2006.** The hydraulic limitation hypothesis revisited. *Plant, Cell*  
785 *& Environment* **29**(3): 367-381.
- 786 **Sack L, Dietrich EM, Streeter CM, Sánchez-Gómez D, Holbrook NM. 2008.** Leaf palmate  
787 venation and vascular redundancy confer tolerance of hydraulic disruption. *Proceedings*  
788 *of the National Academy of Sciences* **105**(5): 1567-1572.
- 789 **Tomlinson PB. 1990.** The Structural Biology of Palms. Oxford, UK: Clarendon Press.
- 790 **Tomlinson PB. 2006.** The uniqueness of palms. *Botanical Journal of the Linnean Society*  
791 **151**(1): 5-14.
- 792 **Tsukaya H. 2006.** Mechanism of leaf-shape determination. *Annual Review of Plant Biology* **57**:  
793 477-496.
- 794 **Vogel S. 2009.** Leaves in the lowest and highest winds: temperature, force and shape. *New*  
795 *Phytologist* **183**(1): 13-26.
- 796 **Wright IJ, Dong N, Maire V, Prentice IC, Westoby M, Díaz S, Gallagher RV, Jacobs BF,**  
797 **Kooyman R, Law EA, Leishman MR. 2017.** Global climatic drivers of leaf size.  
798 *Science* **357**(6354): 917-921.

799 **Zachos J, Pagani M, Sloan L, Thomas E, Billups K. 2001.** Trends, rhythms, and aberrations in  
800 global climate 65 Ma to present. *Science* **292**(5517): 686-693.

801 **Zizka A, Silvestro D, Andermann T, Azevedo J, Duarte Ritter C, Edler D, Farooq H,**  
802 **Herdean A, Ariza M, Scharn R, Svantesson S. 2019.** CoordinateCleaner: Standardized  
803 cleaning of occurrence records from biological collection databases. *Methods in Ecology*  
804 *and Evolution* **10**(5): 744-751.

805  
806 **Tables**

807  
808 Please see the tables in this shared file:  
809 [https://docs.google.com/spreadsheets/d/1QJLNBAhUBWG\\_Rcqfv2j0Ae\\_mR\\_7UaEmn6WvB](https://docs.google.com/spreadsheets/d/1QJLNBAhUBWG_Rcqfv2j0Ae_mR_7UaEmn6WvBmBN5yU/edit?usp=sharing)  
810 [mBN5yU/edit?usp=sharing](https://docs.google.com/spreadsheets/d/1QJLNBAhUBWG_Rcqfv2j0Ae_mR_7UaEmn6WvBmBN5yU/edit?usp=sharing)

811  
812

813 **FIGURES**

814 Figures are attached at the end in high resolution

815

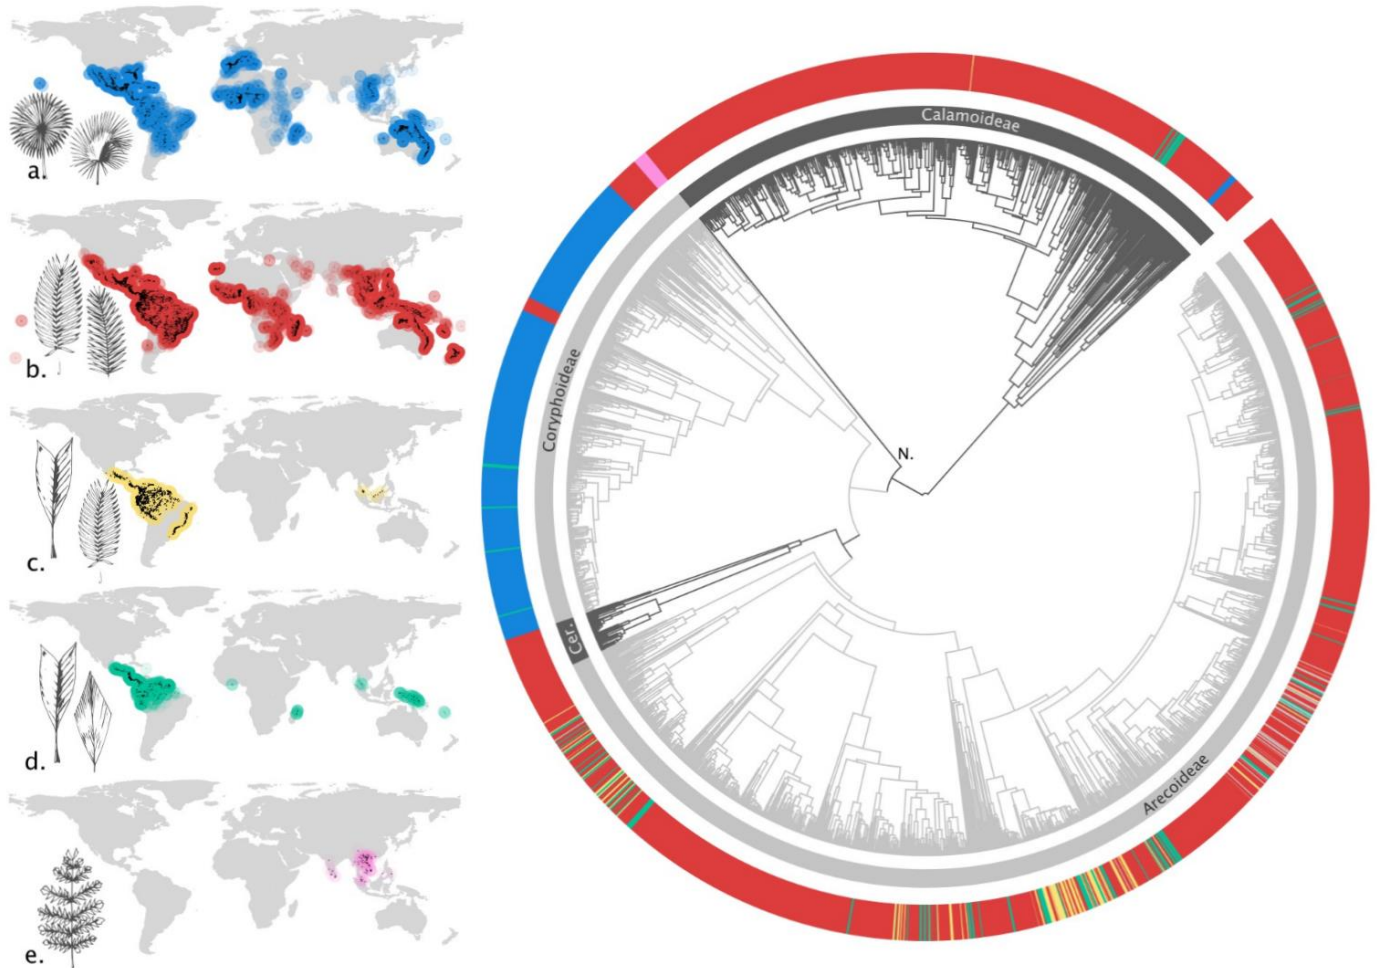

816

817 **Figure 1. Distribution of leaf shapes at a global scale and throughout the phylogeny of**  
818 **Palms. Left:** The maps show the approximate distribution of shapes based on cleaned GBIF  
819 records alone and the distribution of species with no coordinate records available is not reflected  
820 here. Leaf silhouettes were taken from the illustrations in the Genera Palmarum (Dransfield et  
821 al., 2008). **Right:** The calibrated maximum clade credibility tree of 2550 palm species generated  
822 by Faurby et al. (2016). Dark and light greys are used to distinguish between subfamilies. The  
823 outermost ring shows the distribution of leaf shapes across the phylogeny and follows the same  
824 color scheme of the maps. **a)** Palmate + Costapalmate, **b)** Pinnate, **c)** Variable within species, **d)**  
825 Entire, **e)** Bipinnate. **Cer.**= Ceroxyloideae. **N.**= Nypa.

826

827

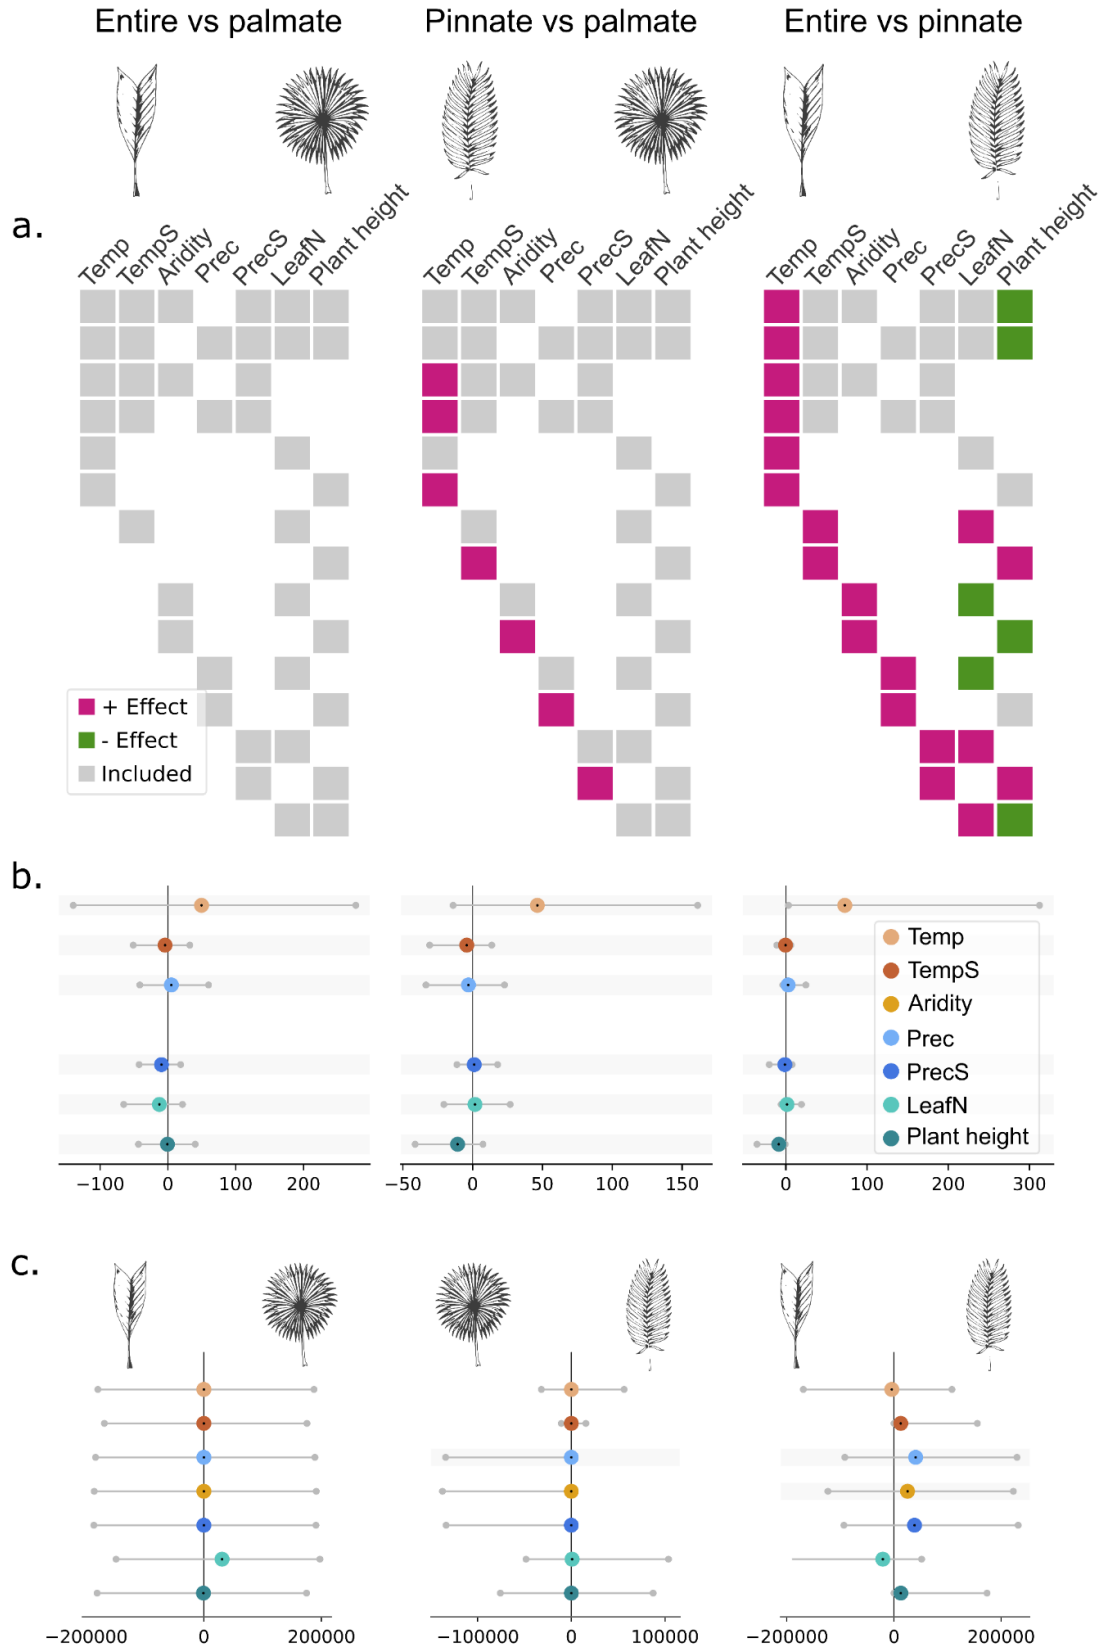

828

829

830 **Figure 2. Results of the Generalized Linear Mixed Models (GLMMs).** Leaf shapes show the  
831 pair in the models (logistic regression; left = 0, right = 1). **a)** Summarised results from all  
832 GLMMs ran; one model per row. Grey boxes represent variables included in each model with  
833 non-significant effects, in magenta are the included variables with significant positive effects,  
834 and in green the included variables with a significant negative effect. **b)** Distribution of estimates  
835 for the most inclusive model (first row in **a**). The colour circle represents the median and the  
836 horizontal bars span from the 2.5% to the 97.5% quantiles of the estimated distribution. Results  
837 including Aridity instead of Precipitation are similar (Supporting Information Fig. S4). **c)**  
838 Summarised results of the models including a single variable, with one model per row. Variables  
839 are coded with the same colours as in **b**) and the leaf shapes coded as left = 0 and right = 1.  
840 **Temp:** mean annual temperature; **TempS** = temperature seasonality; **Prec** = annual  
841 precipitation; **PrecS** = Precipitation seasonality; **LeafN** = Maximum leaf number. Leaf  
842 silhouettes were adapted from the illustrations in the Genera Palmarum (Dransfield et al., 2008).

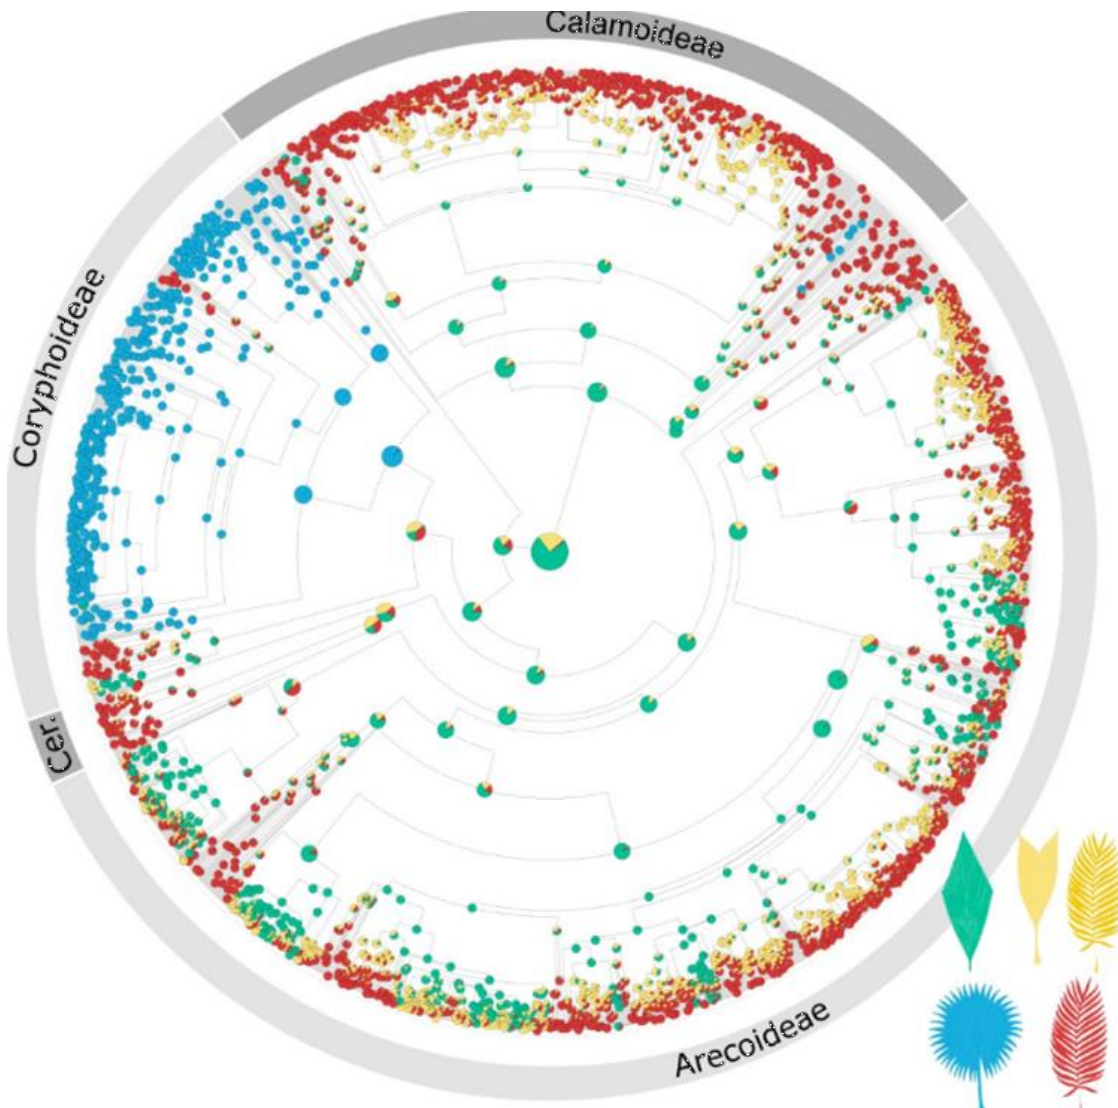

843

844

845 **Figure 3.** Ancestral state reconstruction of leaf shape across palms (Arecaceae) using the  
846 calibrated maximum clade credibility tree generated by Faurby et al., 2016. The pie charts show  
847 the probability of each state at the given node. States are color-coded as follows: **Blue** = Palmate  
848 (costapalmate+palmate); **red** = Pinnate; **green** = Entire; **yellow** = Polymorphic (where  
849 individuals of the same species have either entire or pinnate leaves). **Cer.**= Ceroxyloideae.

850



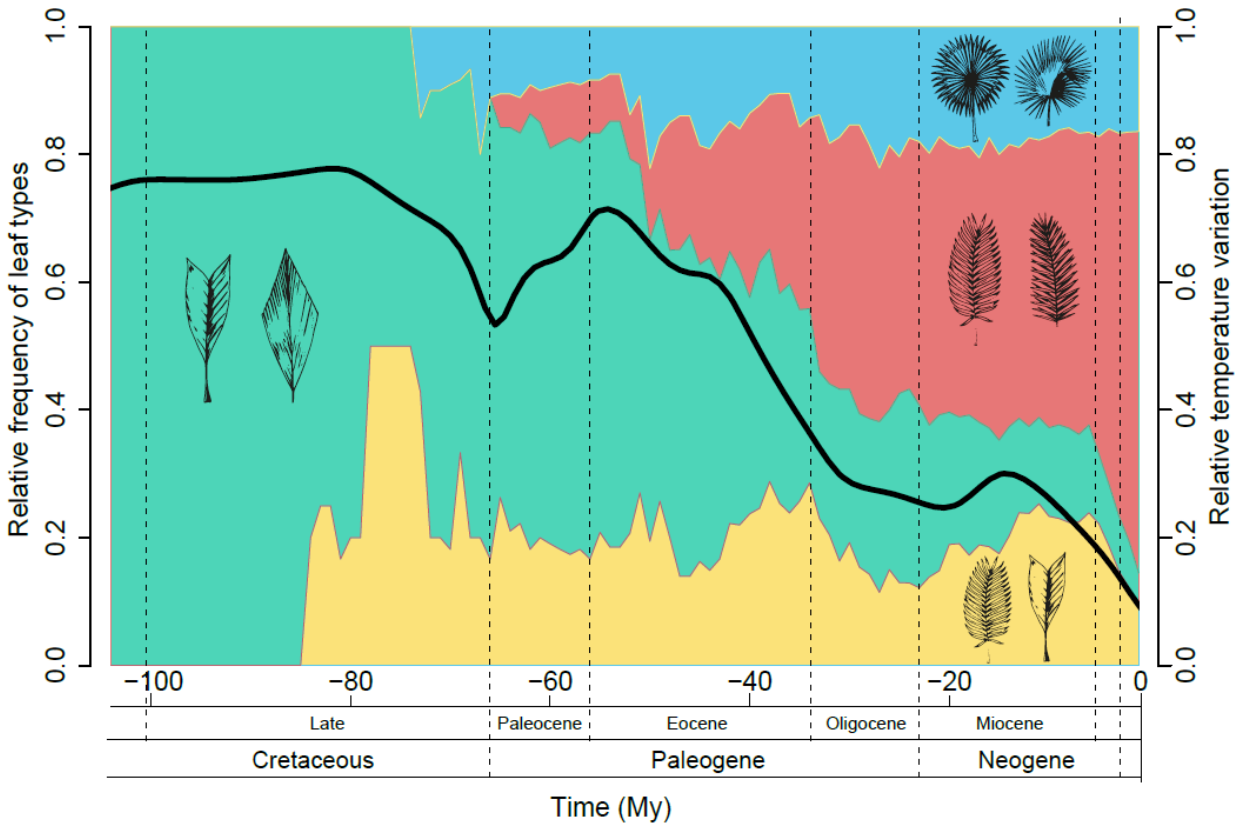

851  
852

853 **Figure 4.** Relative frequency of lineages of each leaf shape through time. Frequencies were  
854 calculated from the ancestral state estimation performed using the best fitting model on the  
855 maximum clade credibility tree. **Blue** = Palmate (costapalmate+palmate); **red** = Pinnate; **green**  
856 = Entire; **yellow** = Polymorphic (where individuals of the same species have either entire or  
857 pinnate leaves). **Note:** here the polymorphic state was split back into pinnate and entire leaves by  
858 assigning one or the other shape randomly.



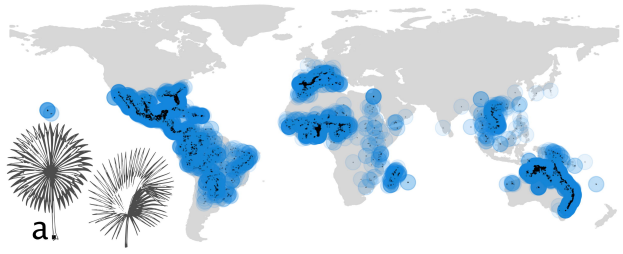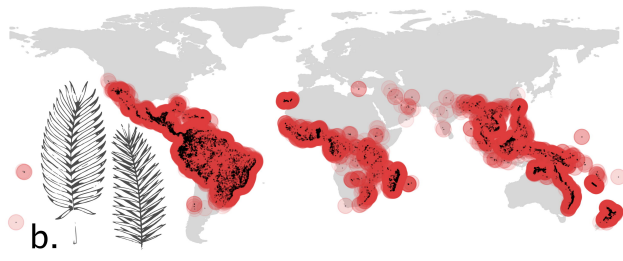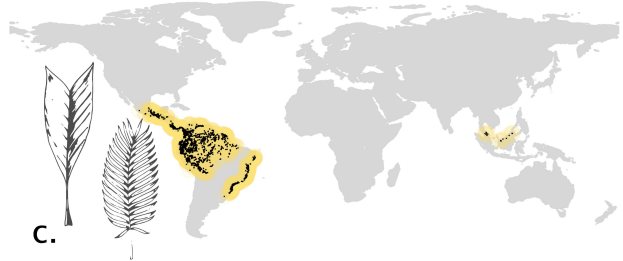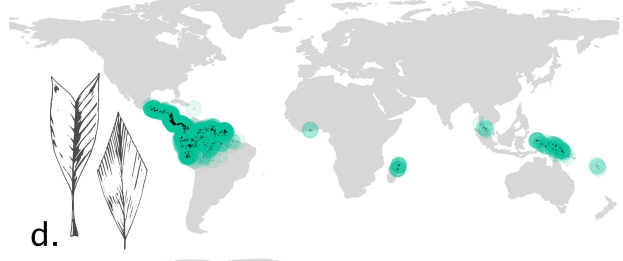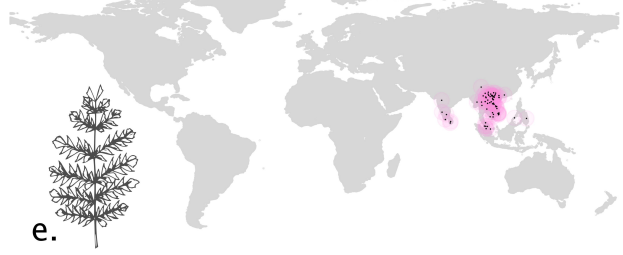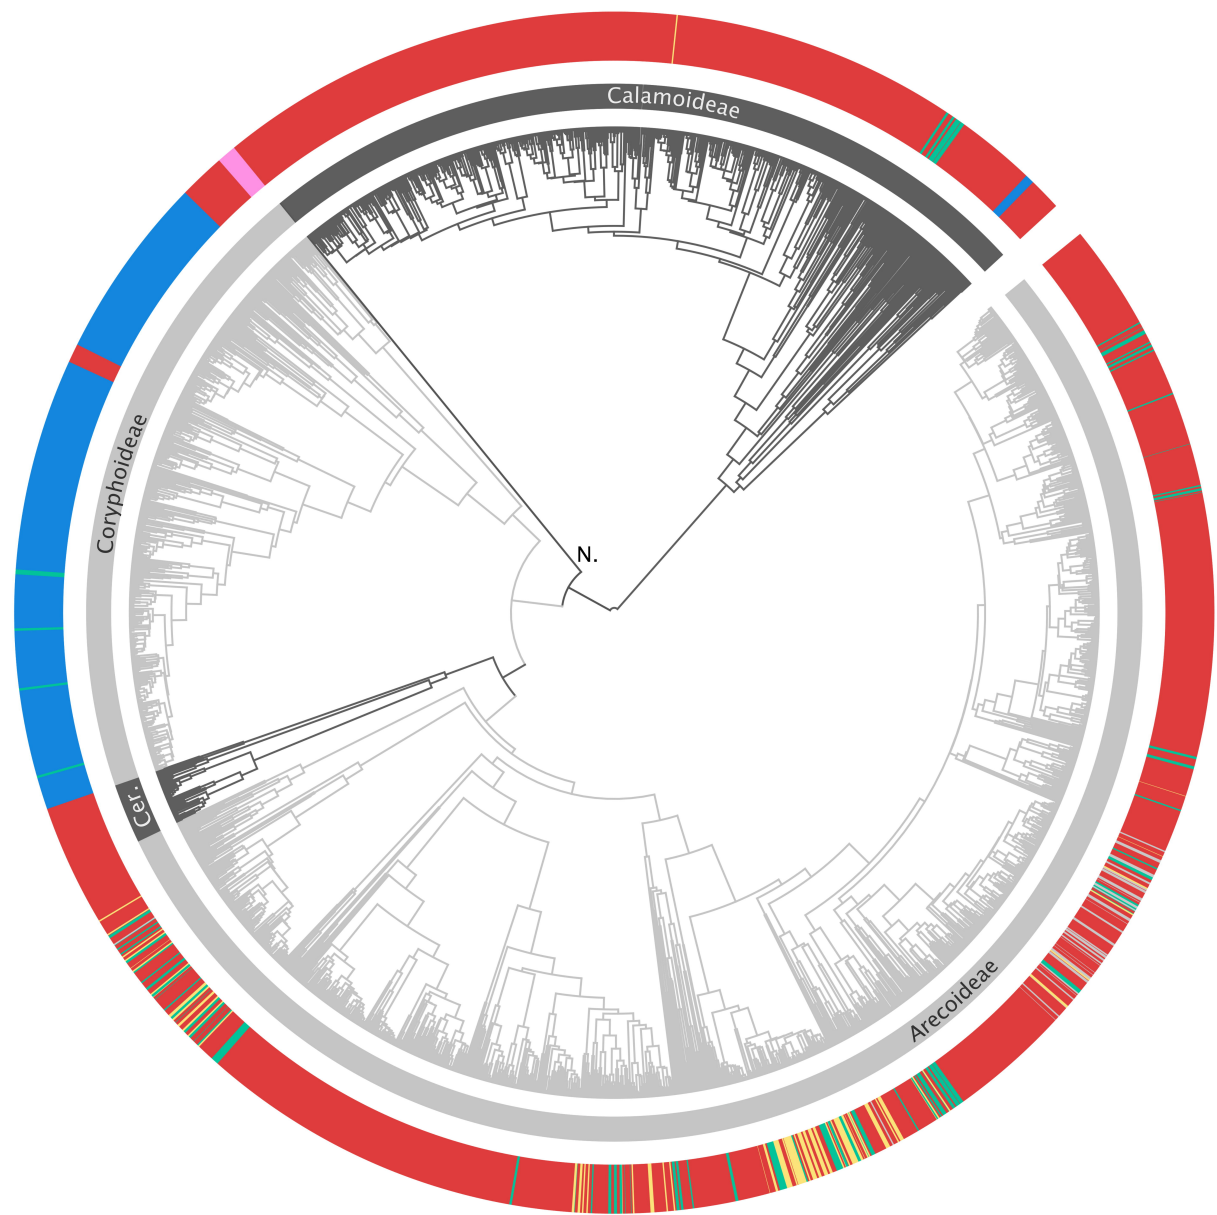

### Entire vs palmate

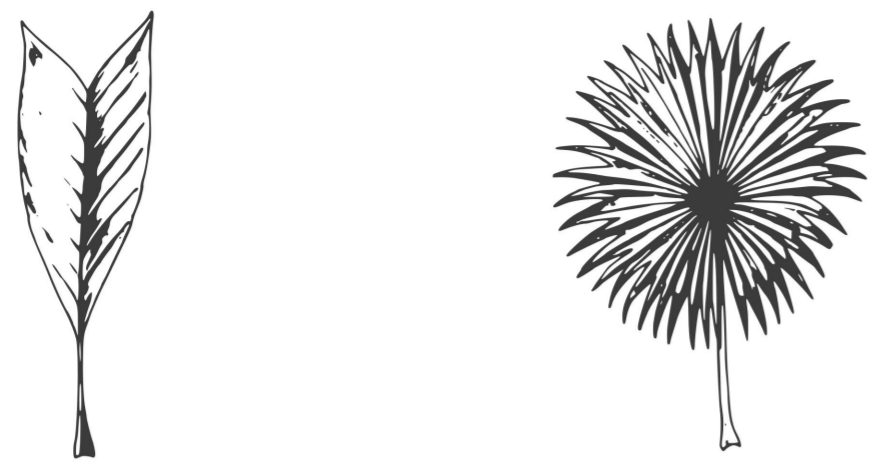

### Pinnate vs palmate

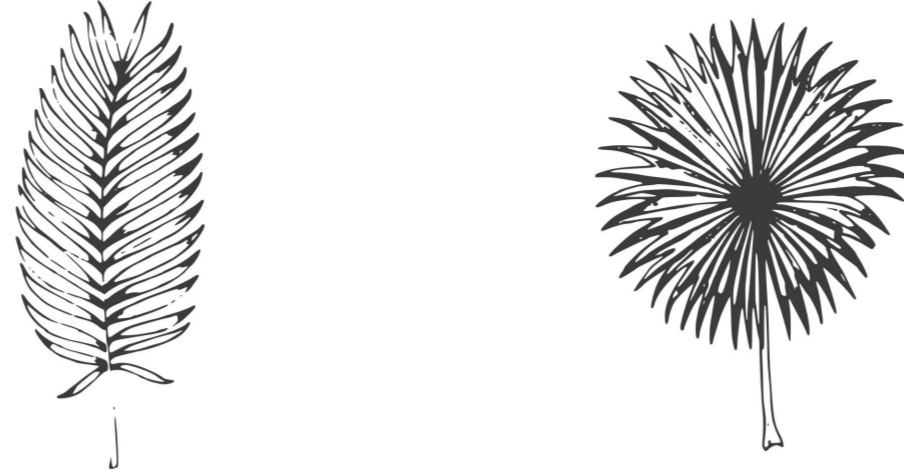

### Entire vs pinnate

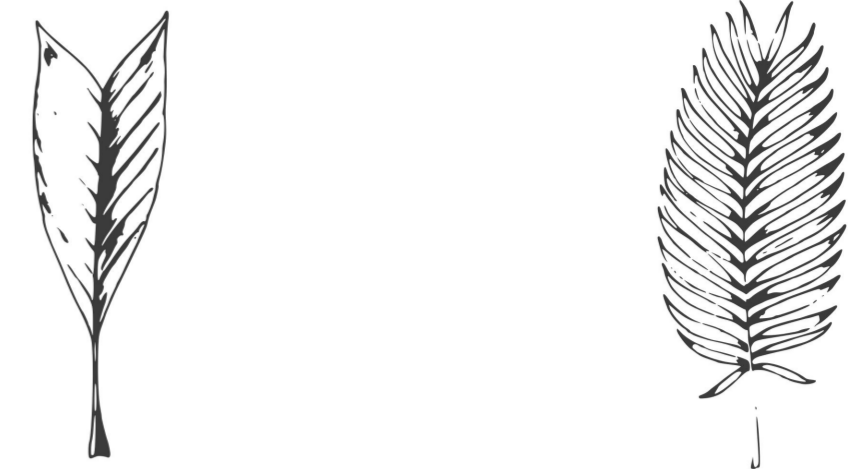

a.

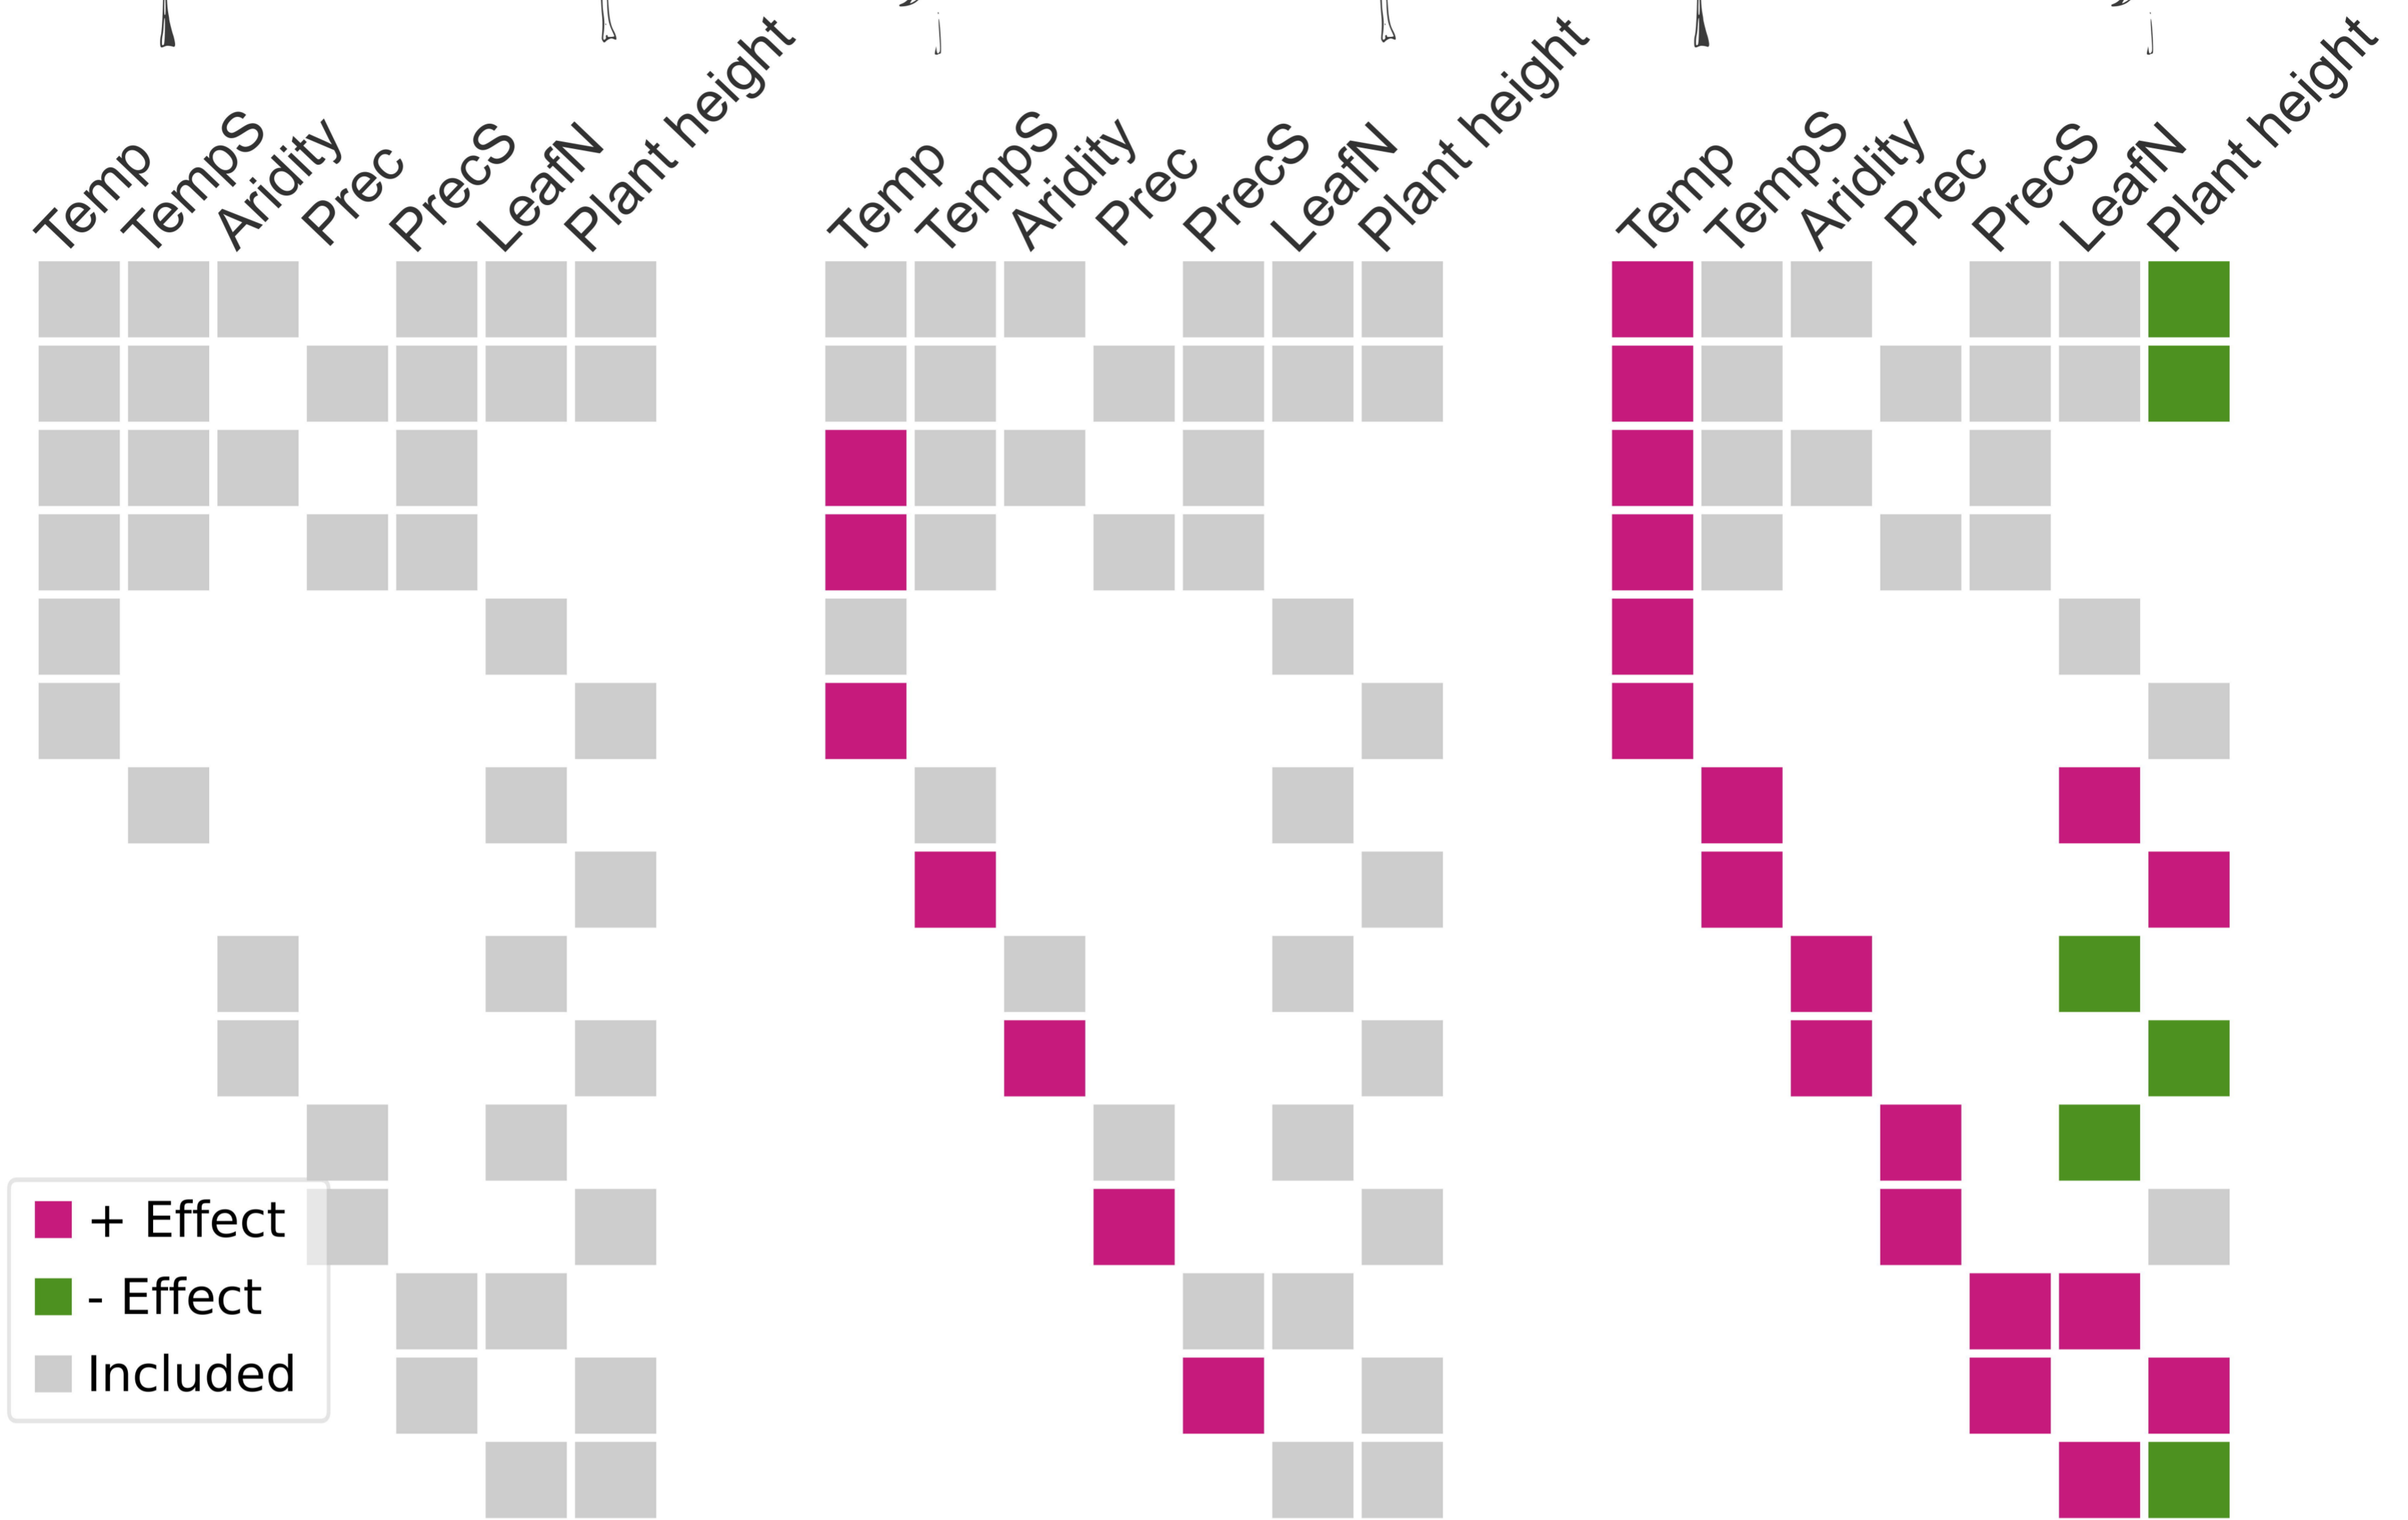

b.

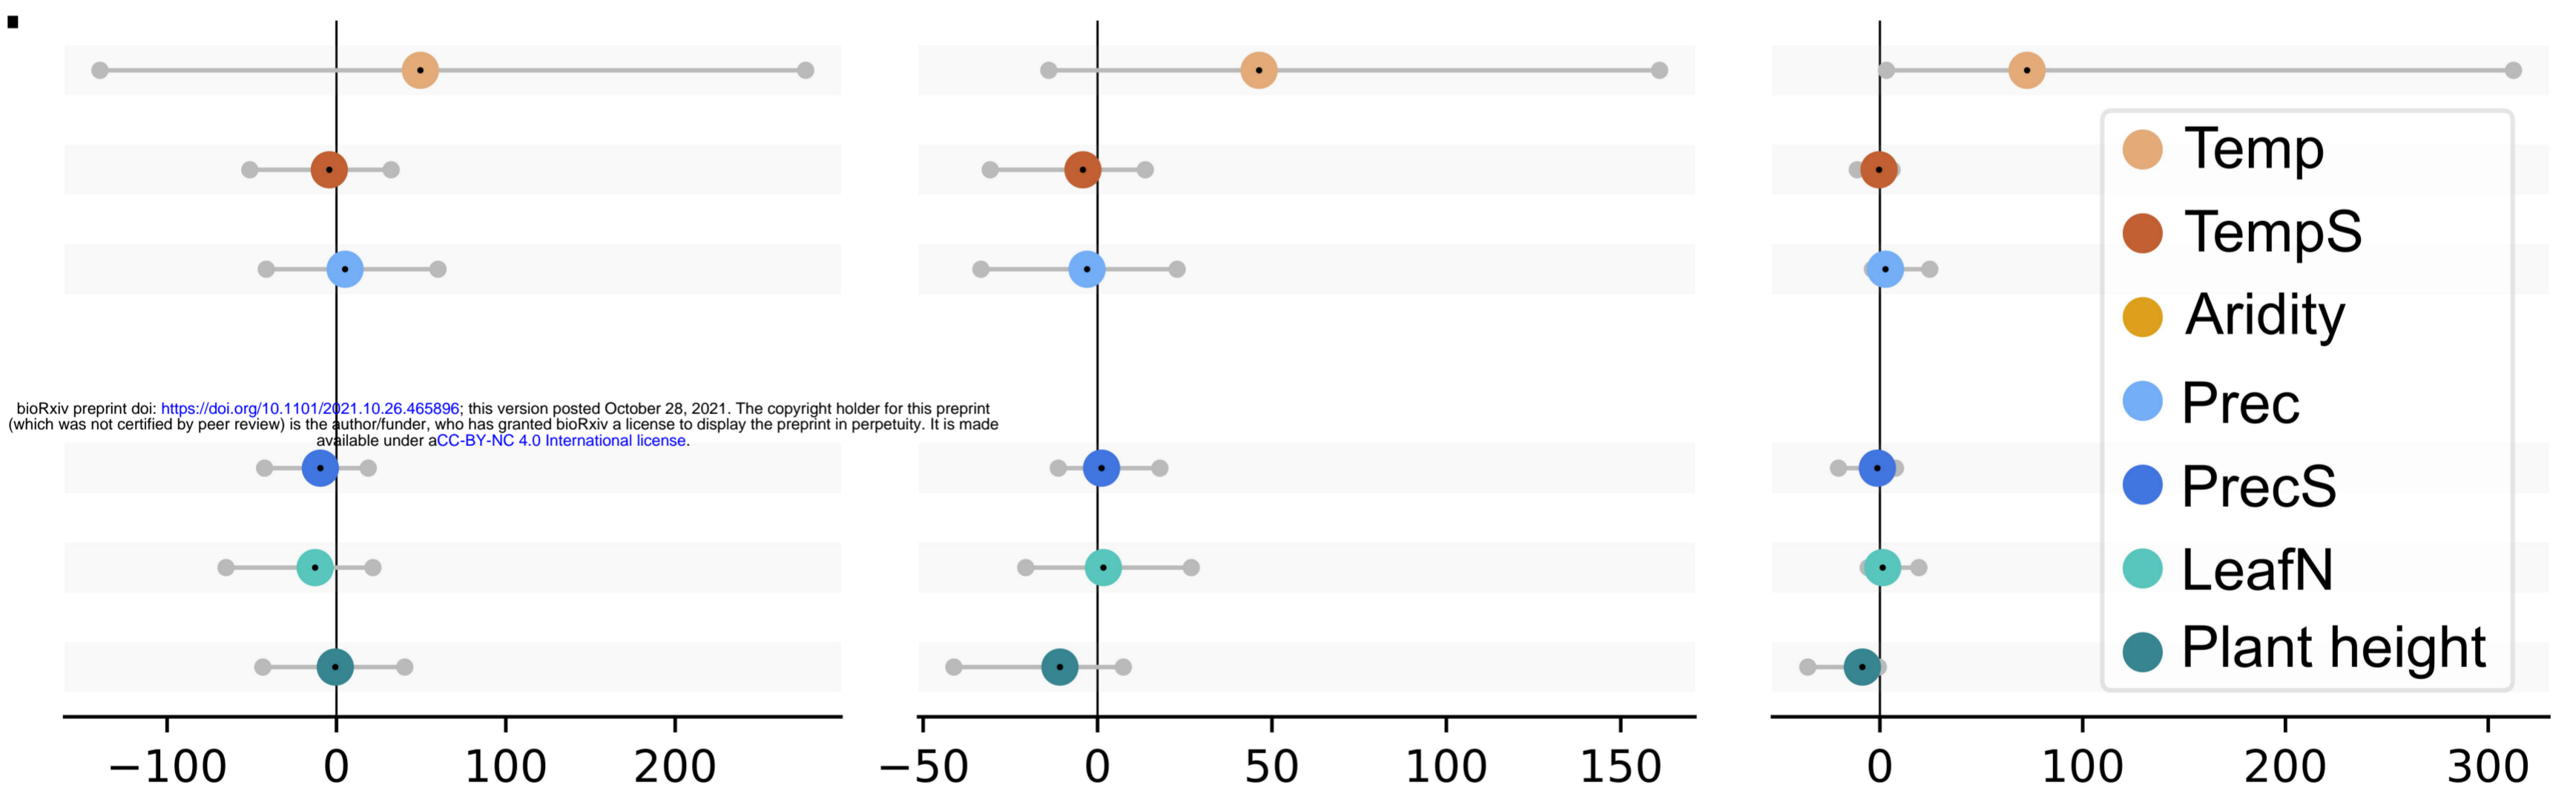

c.

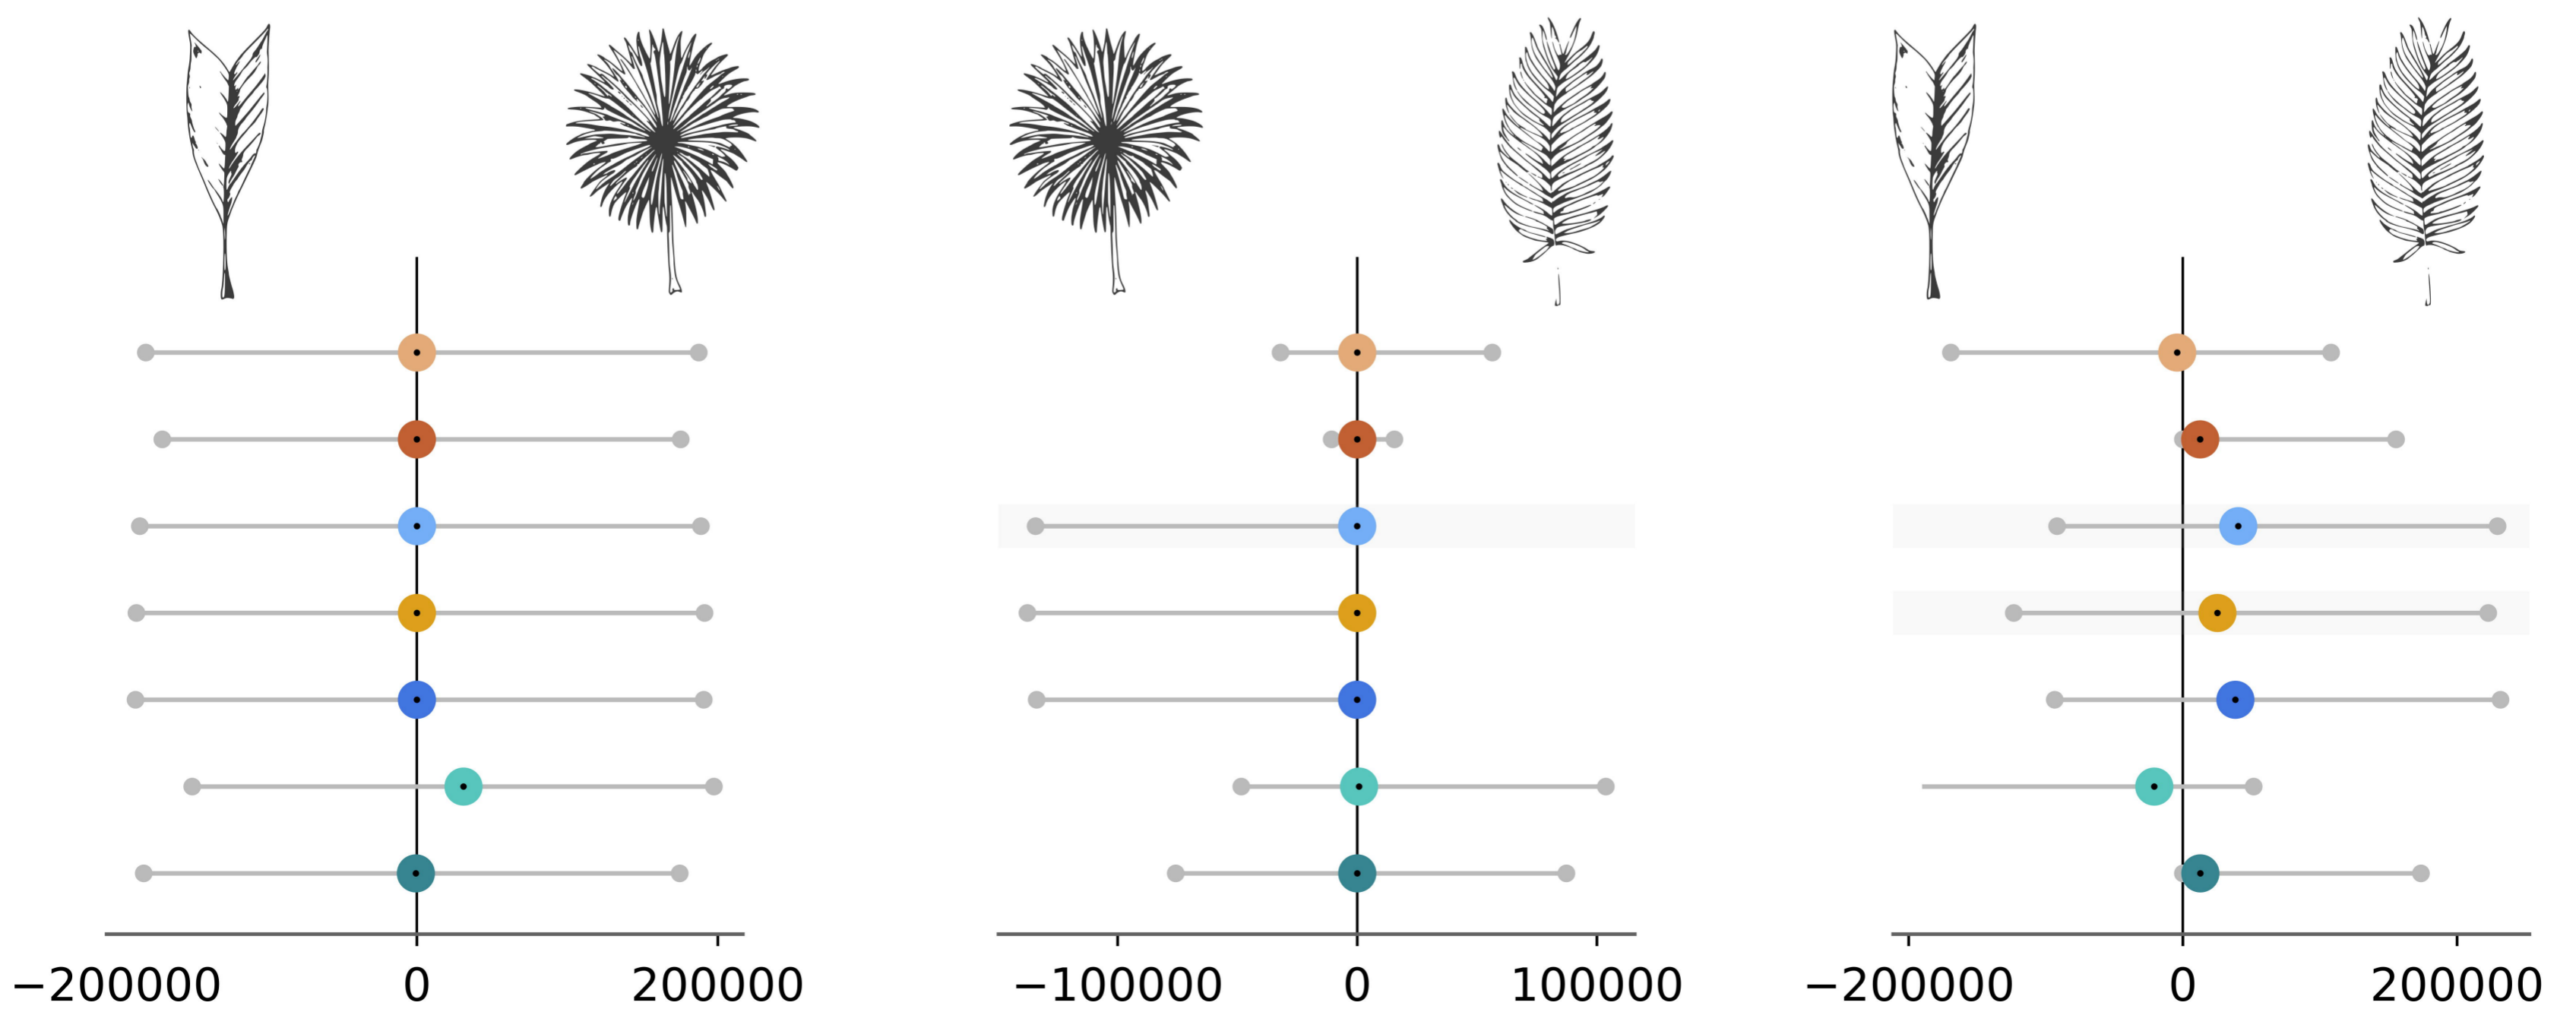



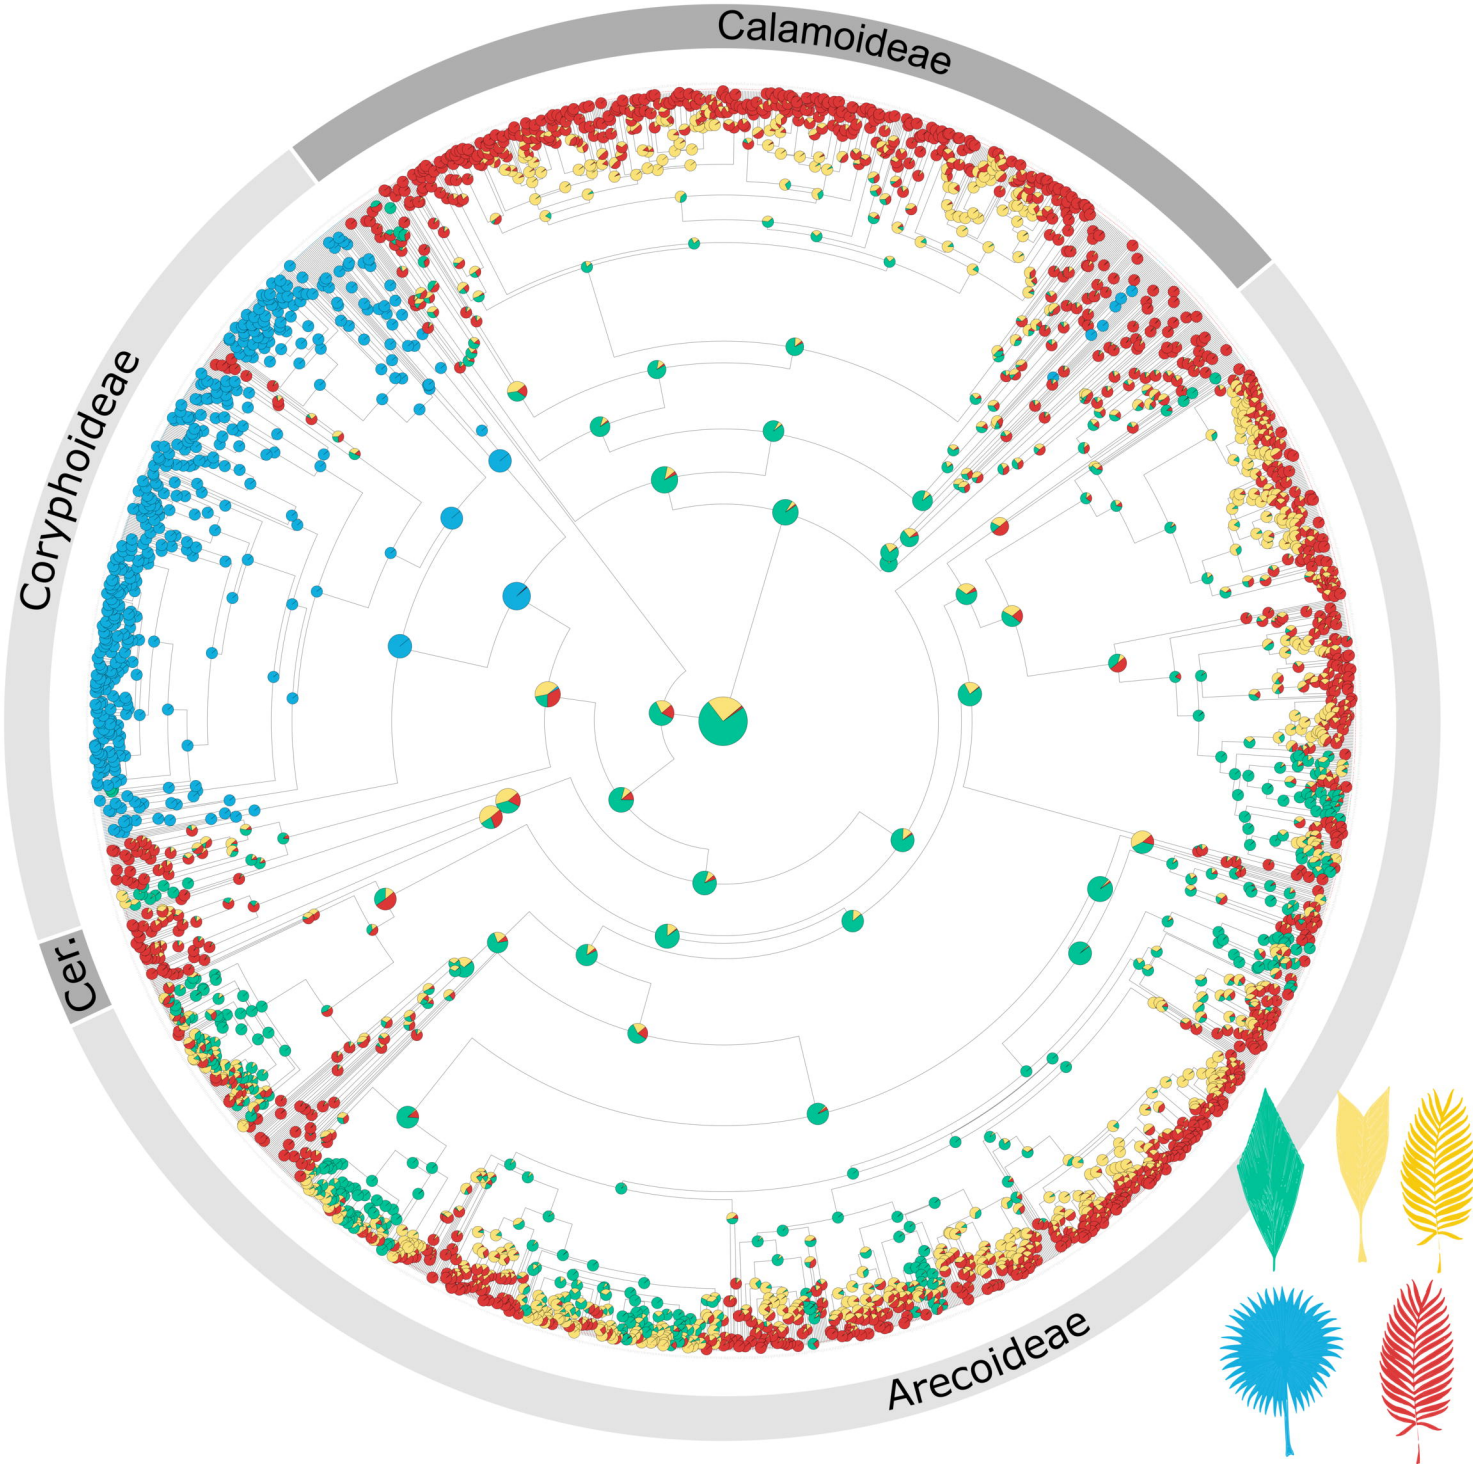

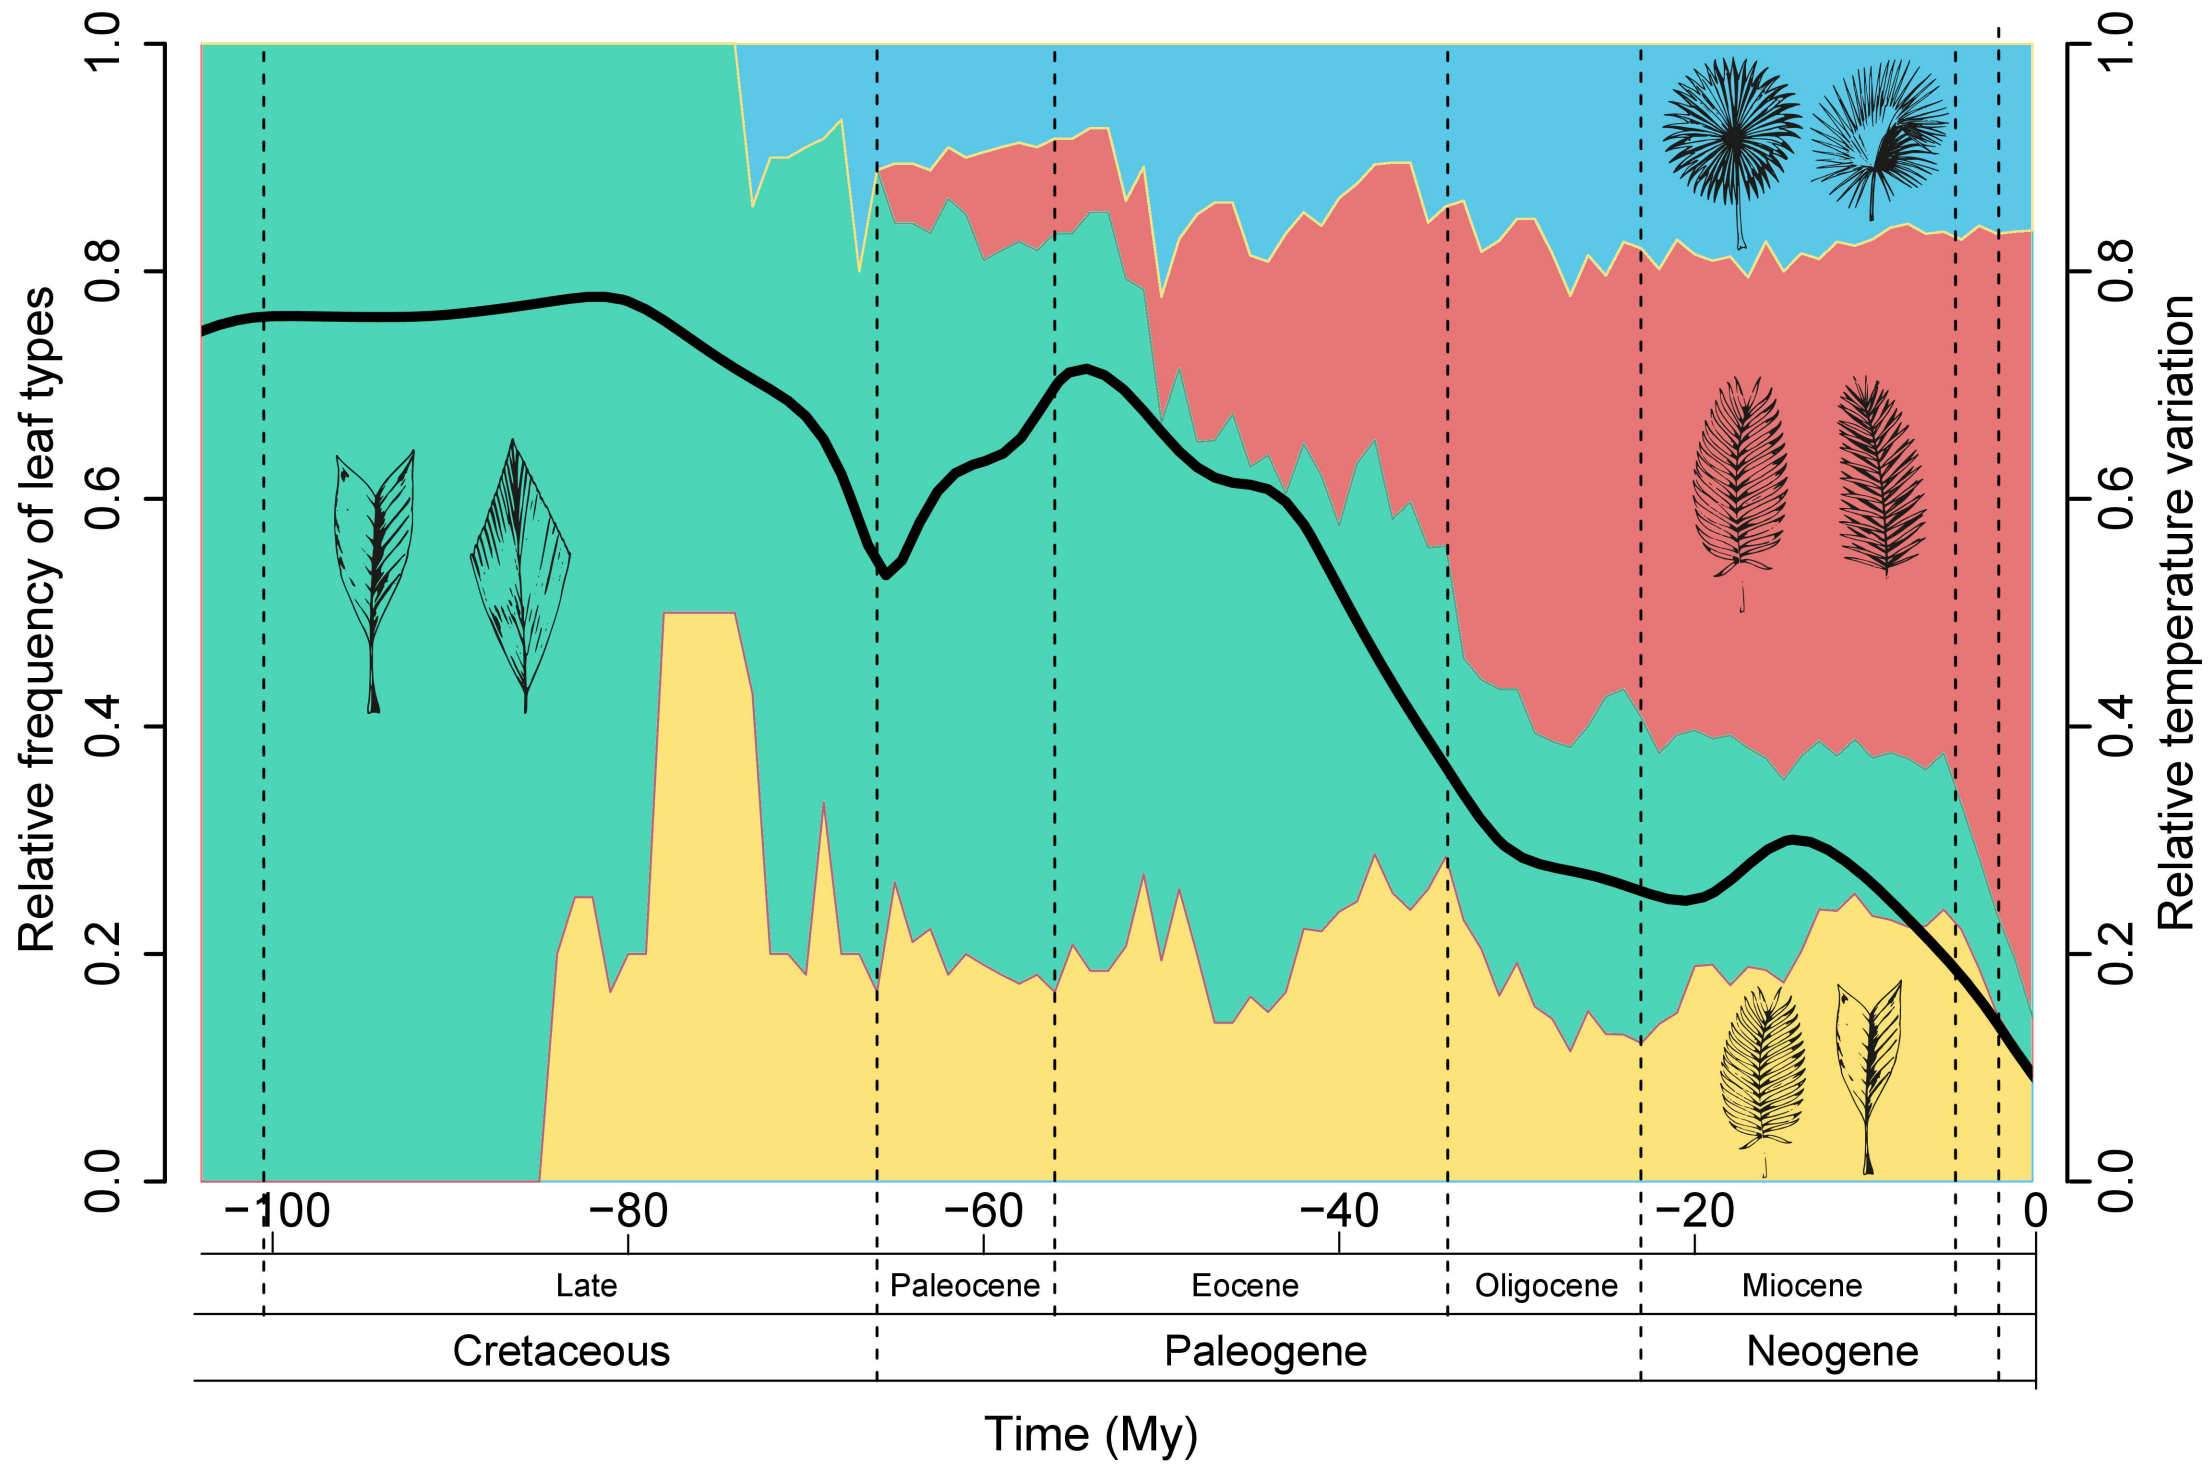

Source: https://www.biorxiv.org/content/10.1101/2021.10.26.465896v1.full.pdf
